# Supplementary material for: Structure–reactivity correlation in selective colorimetric detection of cyanide in solid, organic and aqueous phases using quinone based chemodosimeters
Source: Royal Society of Chemistry journal article supplement (doi:10.1039/c5nj02059j), 2015-11-25
Supplement: c5nj02059j1.pdf [file c5nj02059j1.pdf]

## Structure-Reactivity Correlation in selective colorimetric detection of cyanide in solid, organic and aqueous phases using quinone based chemodosimeters

R. Manivannan and Kuppanagounder P. Elango\*

### Supporting Information

| <b>Figure No.</b> | <b>Content</b>                                                                                       | <b>Page No.</b> |
|-------------------|------------------------------------------------------------------------------------------------------|-----------------|
| <b>S1</b>         | Color change of <b>S1-S5</b> with various anions                                                     | <b>5</b>        |
| <b>S2</b>         | UV-Vis spectra of <b>S2</b> with addition of $\text{CN}^-$ ion                                       | <b>6</b>        |
| <b>S3</b>         | UV-Vis spectra of <b>S3</b> with addition of $\text{CN}^-$ ion                                       | <b>7</b>        |
| <b>S4</b>         | UV-Vis spectra of <b>S4</b> with addition of $\text{CN}^-$ ion                                       | <b>8</b>        |
| <b>S5</b>         | UV-Vis spectra of <b>S5</b> with addition of $\text{CN}^-$ ion                                       | <b>9</b>        |
| <b>S6</b>         | Correlation between Hammett's substituent constants ( $\sigma_p$ ) and $\lambda_{\text{ICT}}$ values | <b>10</b>       |
| <b>S7</b>         | Fluorescence emission spectra of <b>S2</b> with addition of $\text{CN}^-$ ion                        | <b>11</b>       |
| <b>S8</b>         | Fluorescence emission spectra of <b>S3</b> with addition of $\text{CN}^-$ ion                        | <b>12</b>       |
| <b>S9</b>         | Fluorescence emission spectra of <b>S4</b> with addition of $\text{CN}^-$ ion                        | <b>13</b>       |
| <b>S10</b>        | Fluorescence emission spectra of <b>S5</b> with addition of $\text{CN}^-$ ion                        | <b>14</b>       |
|                   | Determination of binding constant (K)                                                                | <b>15</b>       |
| <b>S11</b>        | Benesi-Hildebrand plot of <b>S1-CN</b> complex                                                       | <b>16</b>       |
| <b>S12</b>        | Benesi-Hildebrand plot of <b>S2-CN</b> complex                                                       | <b>17</b>       |

|            |                                                                                                                                                                                                      |           |
|------------|------------------------------------------------------------------------------------------------------------------------------------------------------------------------------------------------------|-----------|
|            |                                                                                                                                                                                                      |           |
| <b>S13</b> | Benesi-Hildebrand plot of <b>S3</b> -CN <sup>-</sup> complex                                                                                                                                         | <b>18</b> |
| <b>S14</b> | Benesi-Hildebrand plot of <b>S4</b> -CN <sup>-</sup> complex                                                                                                                                         | <b>19</b> |
| <b>S15</b> | Benesi-Hildebrand plot of <b>S5</b> -CN <sup>-</sup> complex                                                                                                                                         | <b>20</b> |
| <b>S16</b> | Job's plot of <b>S1</b> with CN <sup>-</sup> ion                                                                                                                                                     | <b>21</b> |
| <b>S17</b> | Detection limit plot of <b>S1</b> -CN <sup>-</sup> complex                                                                                                                                           | <b>22</b> |
| <b>S18</b> | Detection limit plot of <b>S2</b> -CN <sup>-</sup> complex                                                                                                                                           | <b>23</b> |
| <b>S19</b> | Detection limit plot of <b>S3</b> -CN <sup>-</sup> complex                                                                                                                                           | <b>24</b> |
| <b>S20</b> | Detection limit plot of <b>S4</b> -CN <sup>-</sup> complex                                                                                                                                           | <b>25</b> |
| <b>S21</b> | Detection limit plot of <b>S5</b> -CN <sup>-</sup> complex                                                                                                                                           | <b>26</b> |
| <b>S22</b> | <sup>1</sup> H NMR spectrum of <b>S2</b> with addition of (a) 0 eqv. (b) 0.5 eqv. (c) 1.0 eqv. of TBACN in DMSO-d <sub>6</sub>                                                                       | <b>27</b> |
| <b>S23</b> | <sup>1</sup> H NMR spectrum of <b>S3</b> with addition of (a) 0 eqv. (b) 0.5 eqv. (c) 1.0 eqv. of TBACN in DMSO-d <sub>6</sub>                                                                       | <b>28</b> |
| <b>S24</b> | <sup>1</sup> H NMR spectrum of <b>S4</b> with addition of (a) 0 eqv. (b) 0.5 eqv. (c) 1.0 eqv. of TBACN in DMSO-d <sub>6</sub> .                                                                     | <b>29</b> |
| <b>S25</b> | <sup>1</sup> H NMR spectrum of <b>S5</b> with addition of (a) 0 eqv. (b) 0.5 eqv. (c) 1.0 eqv. of TBACN in DMSO-d <sub>6</sub>                                                                       | <b>30</b> |
| <b>S26</b> | <sup>1</sup> H NMR spectrum of (a) free <b>S1</b> (b) <b>S1</b> + 0.5 eqv. F <sup>-</sup> (c) <b>S1</b> + (0.5 eqv. F <sup>-</sup> ) + 2 eqv. CN <sup>-</sup> (d) <b>S1</b> + 1 eqv. CN <sup>-</sup> | <b>31</b> |
| <b>S27</b> | <sup>13</sup> C NMR spectrum of <b>S5</b> with addition of TBACN in DMSO-d <sub>6</sub>                                                                                                              | <b>32</b> |
| <b>S28</b> | Changes in redox properties of <b>S2</b> upon addition of TBACN in ACN                                                                                                                               | <b>33</b> |
| <b>S29</b> | Changes in redox properties of <b>S3</b> upon addition of TBACN in ACN                                                                                                                               | <b>34</b> |
| <b>S30</b> | Changes in redox properties of <b>S4</b> upon addition of                                                                                                                                            | <b>35</b> |

|                 |                                                                                          |           |
|-----------------|------------------------------------------------------------------------------------------|-----------|
|                 | TBACN in ACN                                                                             |           |
| <b>S31</b>      | Changes in redox properties of <b>S5</b> upon addition of TBACN in ACN                   | <b>36</b> |
| <b>S32</b>      | Optimized structure for sensors <b>S1-S5</b> and its cyanide complex                     | <b>37</b> |
| <b>S33</b>      | Molecular orbitals (HOMO–LUMO) of sensors <b>S1-S5</b>                                   | <b>38</b> |
| <b>S34</b>      | Molecular orbitals (HOMO –LUMO) of sensors–CN <sup>-</sup> complexes                     | <b>39</b> |
| <b>Table S1</b> | Energies (in eV) of the MOs in free sensors and in sensor- CN <sup>-</sup> ion complexes | <b>40</b> |
| <b>S35</b>      | Color change of test strips upon dipping in solution of NaCN in deep well water.         | <b>41</b> |
| <b>S36</b>      | <sup>1</sup> H NMR spectrum of <b>S1</b> in DMSO-d <sub>6</sub>                          | <b>42</b> |
| <b>S37</b>      | <sup>1</sup> H- <sup>1</sup> H COSY spectrum of <b>S1</b> in DMSO-d <sub>6</sub>         | <b>43</b> |
| <b>S38</b>      | <sup>13</sup> C NMR spectrum of <b>S1</b> in DMSO-d <sub>6</sub>                         | <b>44</b> |
| <b>S39</b>      | LCMS spectrum of <b>S1</b>                                                               | <b>45</b> |
| <b>S40</b>      | <sup>1</sup> H NMR spectrum of <b>S2</b> in DMSO-d <sub>6</sub>                          | <b>46</b> |
| <b>S41</b>      | <sup>13</sup> C NMR spectrum of <b>S2</b> in DMSO-d <sub>6</sub>                         | <b>47</b> |
| <b>S42</b>      | LCMS spectrum of <b>S2</b>                                                               | <b>48</b> |
| <b>S43</b>      | <sup>1</sup> H NMR spectrum of <b>S3</b> in DMSO-d <sub>6</sub>                          | <b>49</b> |
| <b>S44</b>      | <sup>1</sup> H- <sup>1</sup> H COSY spectrum of <b>S3</b> in DMSO-d <sub>6</sub>         | <b>50</b> |
| <b>S45</b>      | <sup>13</sup> C NMR spectrum of <b>S3</b> in DMSO-d <sub>6</sub>                         | <b>51</b> |
| <b>S46</b>      | LCMS spectrum of <b>S3</b>                                                               | <b>52</b> |
| <b>S47</b>      | <sup>1</sup> H NMR spectrum of <b>S4</b> in DMSO-d <sub>6</sub>                          | <b>53</b> |
| <b>S48</b>      | <sup>1</sup> H- <sup>1</sup> H COSY spectrum of <b>S4</b> in DMSO-d <sub>6</sub>         | <b>54</b> |

|            |                                                                                         |           |
|------------|-----------------------------------------------------------------------------------------|-----------|
| <b>S49</b> | <sup>13</sup> C NMR spectrum of <b>S4</b> in DMSO-d <sub>6</sub>                        | <b>55</b> |
| <b>S50</b> | LCMS spectrum of <b>S4</b>                                                              | <b>56</b> |
| <b>S51</b> | <sup>1</sup> H NMR spectrum of <b>S5</b> in DMSO-d <sub>6</sub>                         | <b>57</b> |
| <b>S52</b> | <sup>13</sup> C NMR spectrum of <b>S5</b> in DMSO-d <sub>6</sub>                        | <b>58</b> |
| <b>S53</b> | LCMS spectrum of <b>S5</b>                                                              | <b>59</b> |
| <b>S54</b> | <sup>1</sup> H NMR spectrum of <b>S5-CN<sup>-</sup></b> complex in DMSO-d <sub>6</sub>  | <b>60</b> |
| <b>S55</b> | <sup>13</sup> C NMR spectrum of <b>S5-CN<sup>-</sup></b> complex in DMSO-d <sub>6</sub> | <b>61</b> |
| <b>S56</b> | LCMS spectrum of <b>S5-CN<sup>-</sup></b> complex                                       | <b>62</b> |

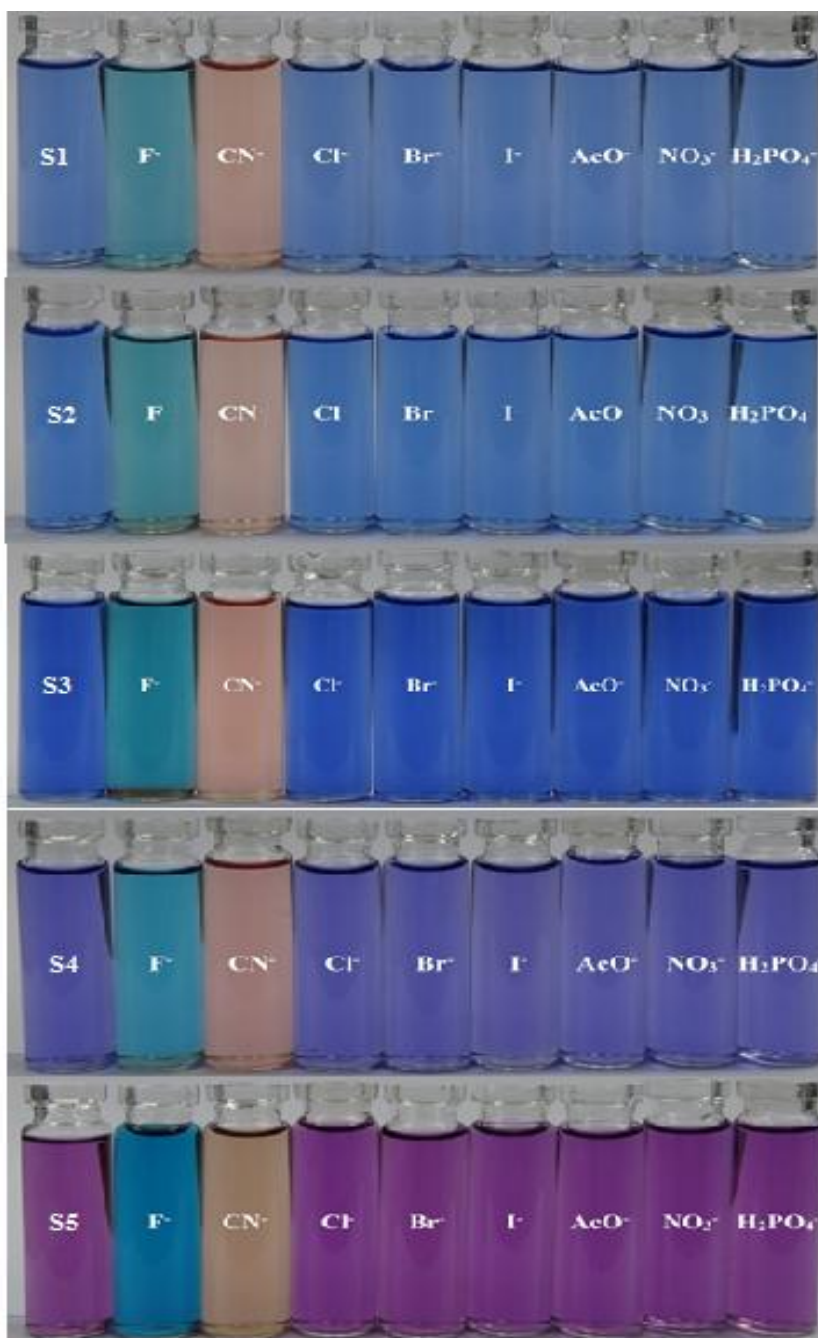

**Fig. S1.** Color change of **S1-S5** ( $6.25 \times 10^{-5}$  M) with various anions.

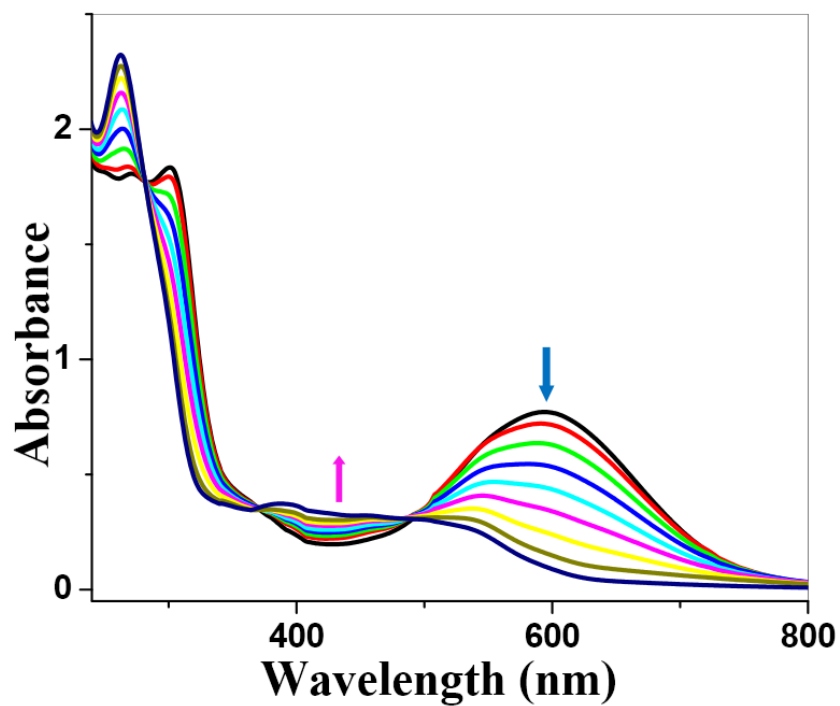

**Fig. S2.** UV-Vis spectra of **S2** ( $6.25 \times 10^{-5}$  M) with incremental addition of TBACN ( $0$ - $6.25 \times 10^{-6}$  M) in aq. HEPES buffer/ACN (8:2 v/v).

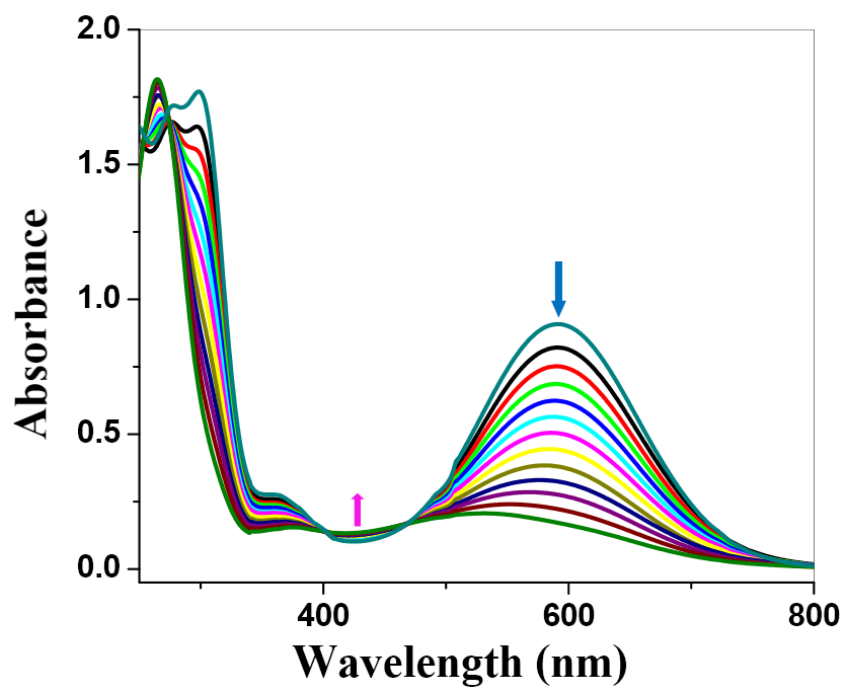

**Fig. S3.** UV-Vis spectra of **S3** ( $6.25 \times 10^{-5}$  M) with incremental addition of TBACN ( $0$ - $6.25 \times 10^{-6}$  M) in aq. HEPES buffer/ACN (8:2 v/v).

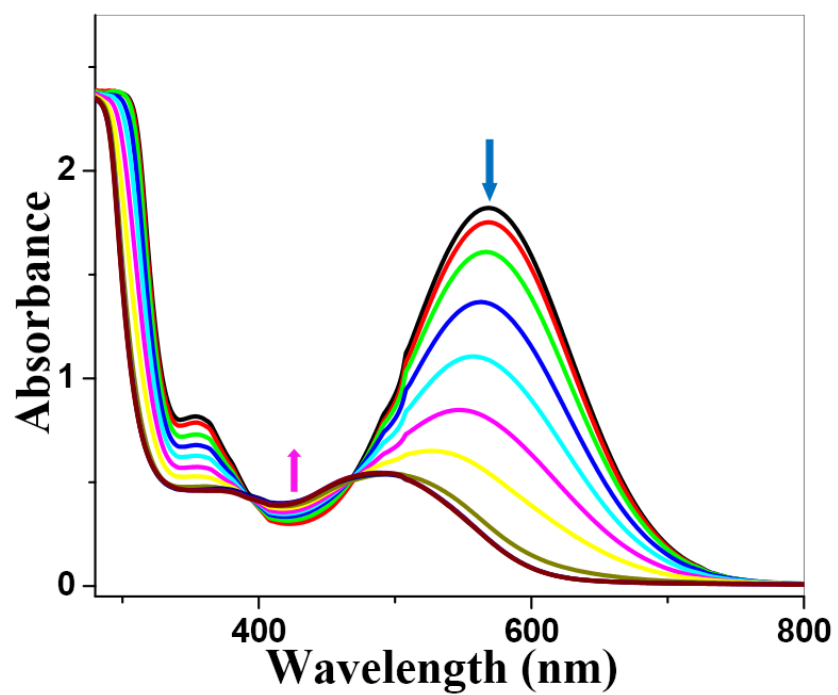

**Fig. S4.** UV-Vis spectra of **S4** ( $6.25 \times 10^{-5}$  M) with incremental addition of TBACN ( $0$ - $6.25 \times 10^{-6}$  M) in aq. HEPES buffer/ACN (8:2 v/v).



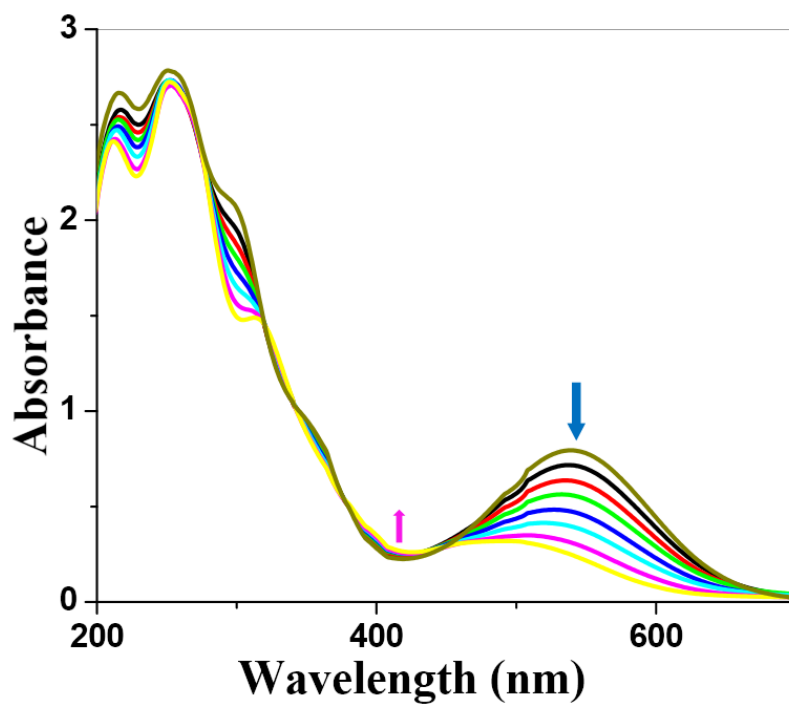

**Fig. S5.** UV-Vis spectra of **S5** ( $6.25 \times 10^{-5}$  M) with incremental addition of TBACN ( $0$ - $6.25 \times 10^{-6}$  M) in aq. HEPES buffer/ACN (8:2 v/v).

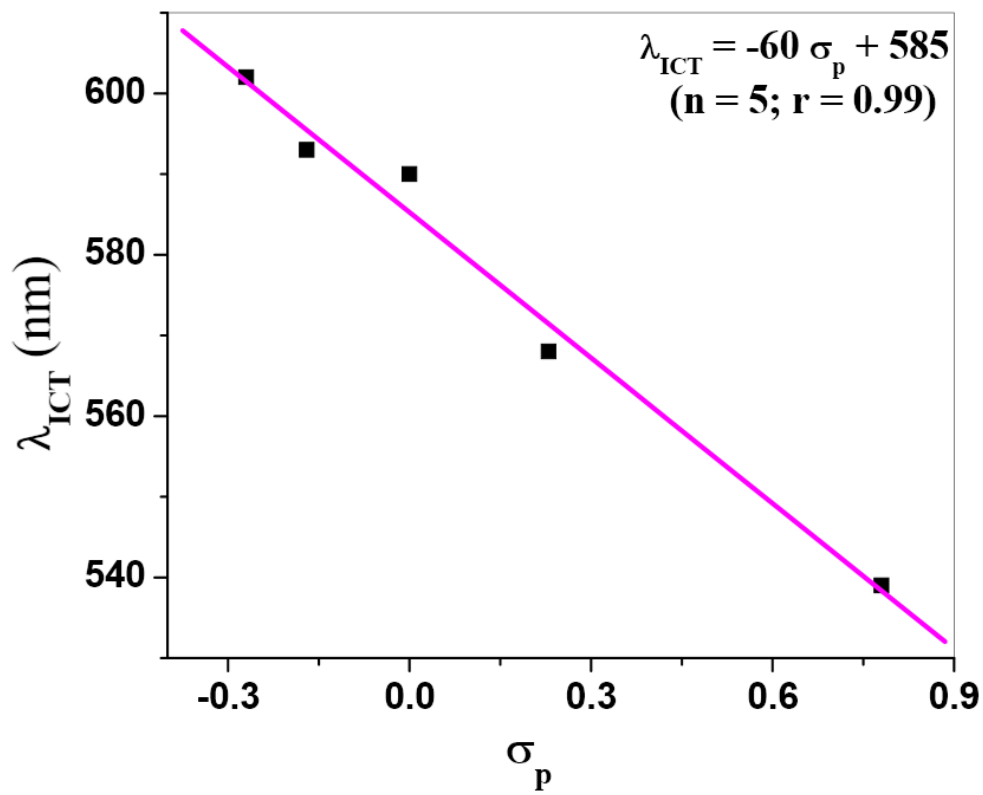

**Fig. S6.** Correlation between the  $\lambda_{ICT}$  and the Hammett's substituent constants ( $\sigma_p$ )

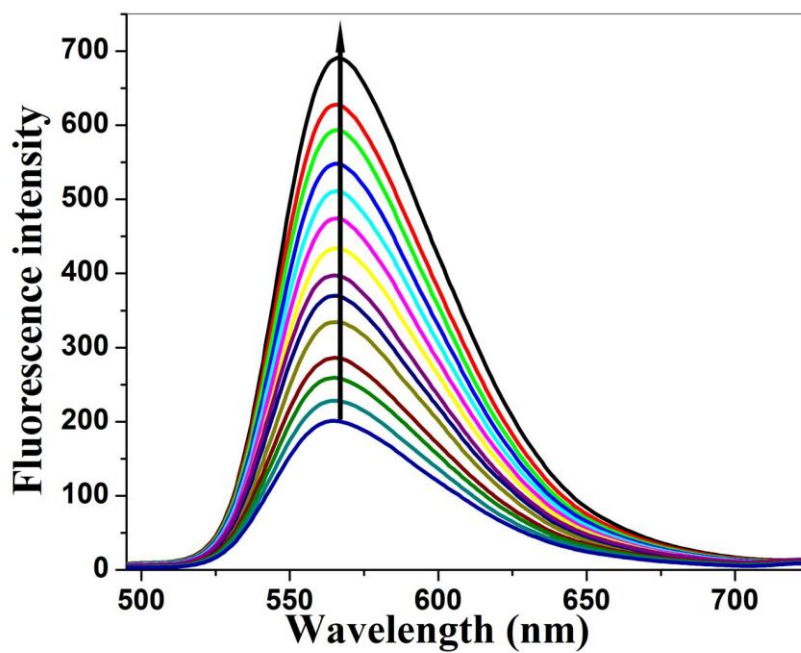

**Fig. S7.** Fluorescence spectra of **S2** ( $6.25 \times 10^{-5} \text{ M}$ ) with incremental addition of TBACN ( $0$ - $6.25 \times 10^{-6} \text{ M}$ ) in aq. HEPES buffer/ACN (8:2 v/v).

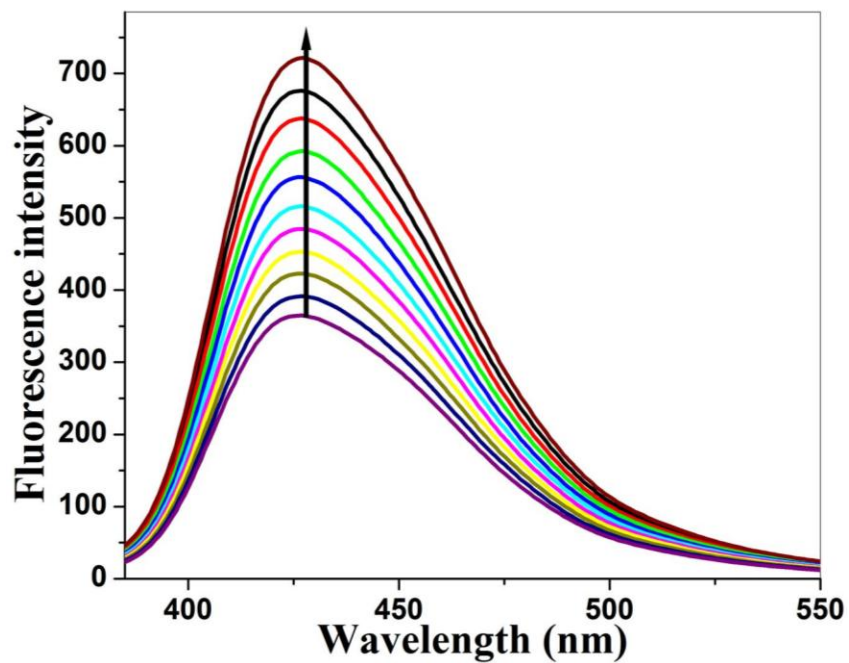

**Fig. S8.** Fluorescence spectra of **S3** ( $6.25 \times 10^{-5} \text{ M}$ ) with incremental addition of TBACN ( $0$ - $6.25 \times 10^{-6} \text{ M}$ ) in aq. HEPES buffer/ACN (8:2 v/v).

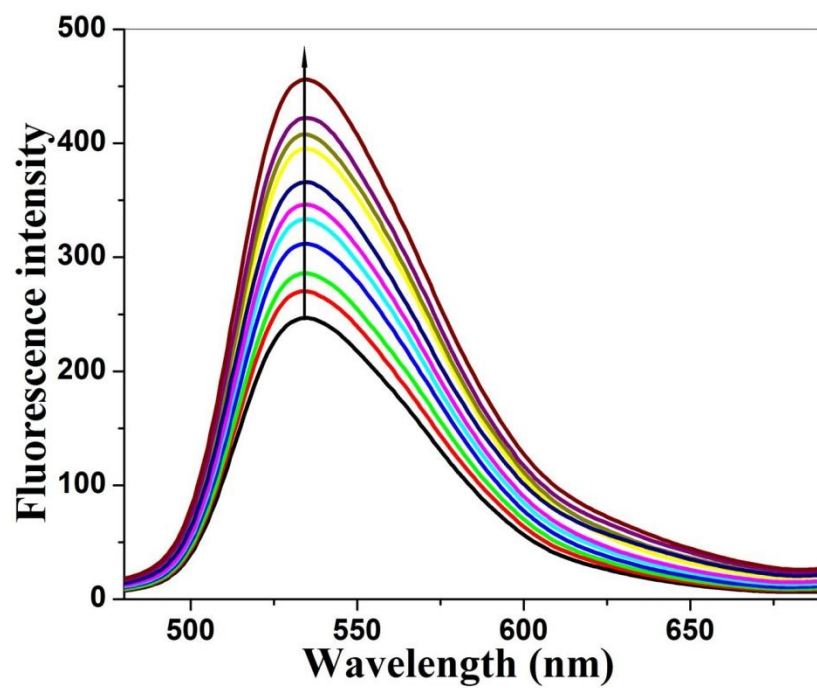

**Fig. S9.** Fluorescence spectra of **S4** ( $6.25 \times 10^{-5} \text{ M}$ ) with incremental addition of TBACN ( $0-6.25 \times 10^{-6} \text{ M}$ ) in aq. HEPES buffer/ACN (8:2 v/v).

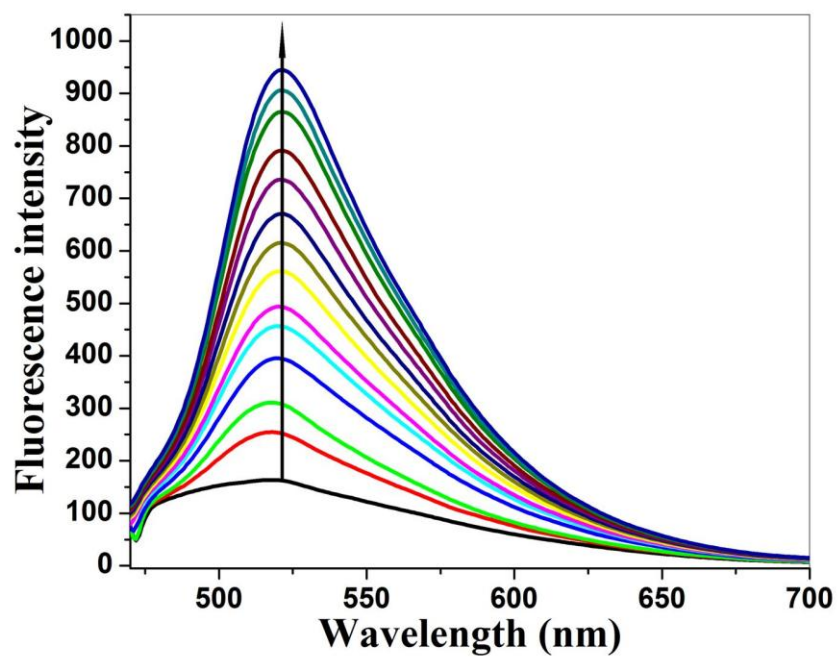

**Fig. S10.** Fluorescence spectra of **S5** ( $6.25 \times 10^{-5} \text{M}$ ) with incremental addition of TBACN ( $0-6.25 \times 10^{-6} \text{M}$ ) in aq. HEPES buffer/ACN (8:2 v/v).

### Determination of binding constant (K)

From the fluorescence enhancement data the binding constants for the sensors-cyanide complexes can be determined using the following Benesi-Hildebrand equation [37]:

$$(F_{\infty}-F_0)/(F_x-F_0) = 1/K [\text{CN}^-]$$

Where  $F_0$ ,  $F_x$  and  $F_{\infty}$  are the fluorescence intensities of the sensor in the absence of cyanide ions, at given cyanide ion concentrations and at a concentration for complete interaction, respectively. In the present study in all the cases plots of  $(F_{\infty}-F_0)/(F_x-F_0)$  versus  $1/[\text{CN}^-]$  are linear ( $r > 0.995$ ; Fig. S11-S15).

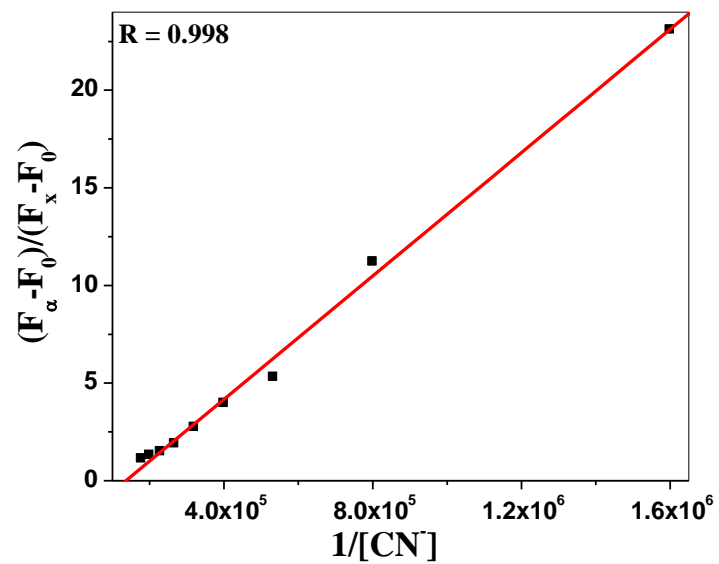

**Fig. S11.** Benesi-Hildebrand plot of S1-CN<sup>-</sup> complex.



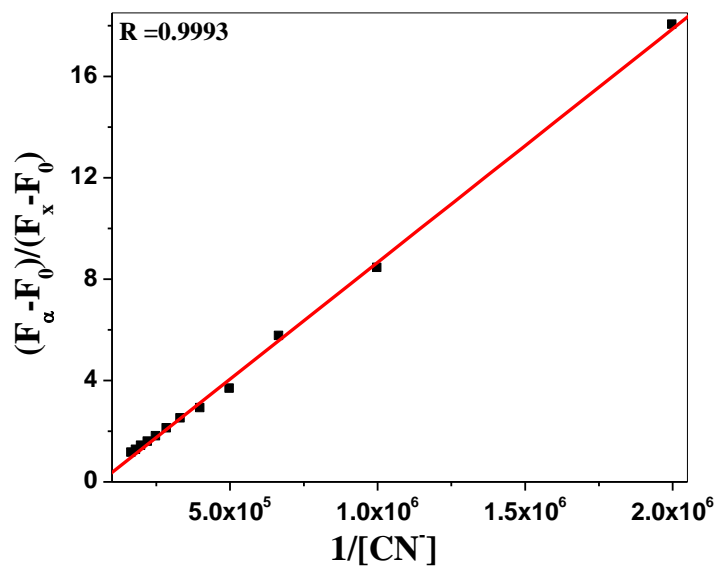

**Fig. S12.** Benesi-Hildebrand plot of S2-CN<sup>-</sup> complex.

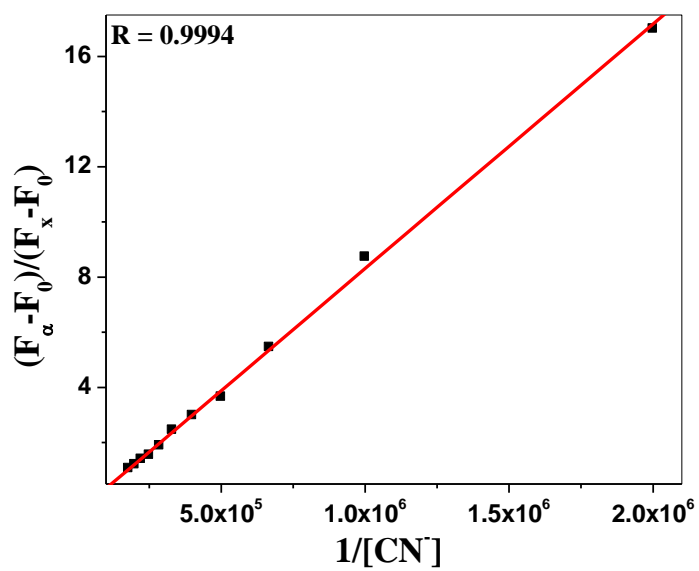

**Fig. S13.** Benesi-Hildebrand plot of S3-CN<sup>-</sup> complex.

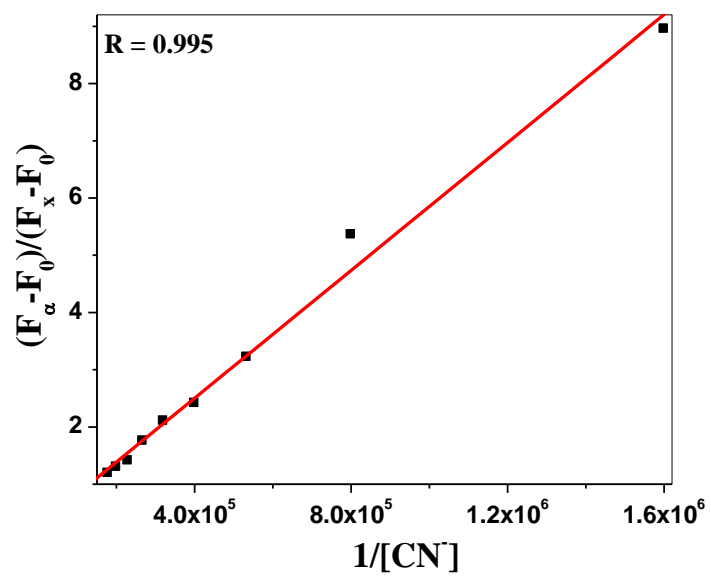

**Fig. S14.** Benesi-Hildebrand plot of S4-CN<sup>-</sup> complex.

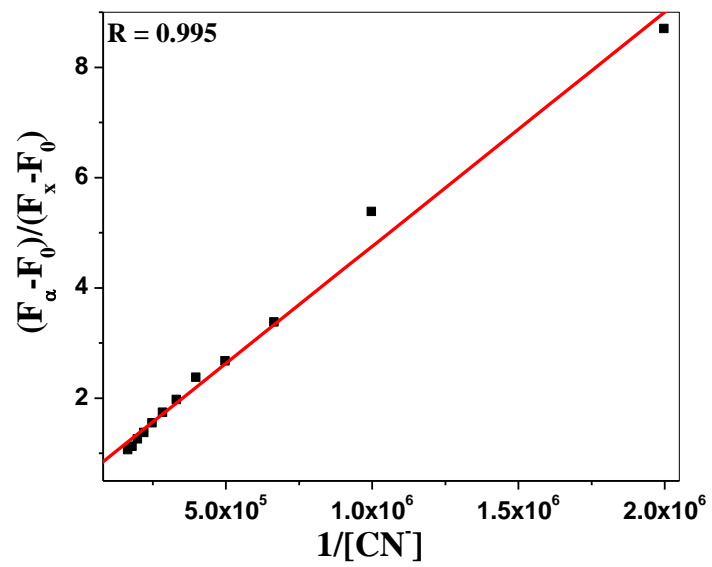

**Fig. S15.** Benesi-Hildebrand plot of S5-CN<sup>-</sup> complex.

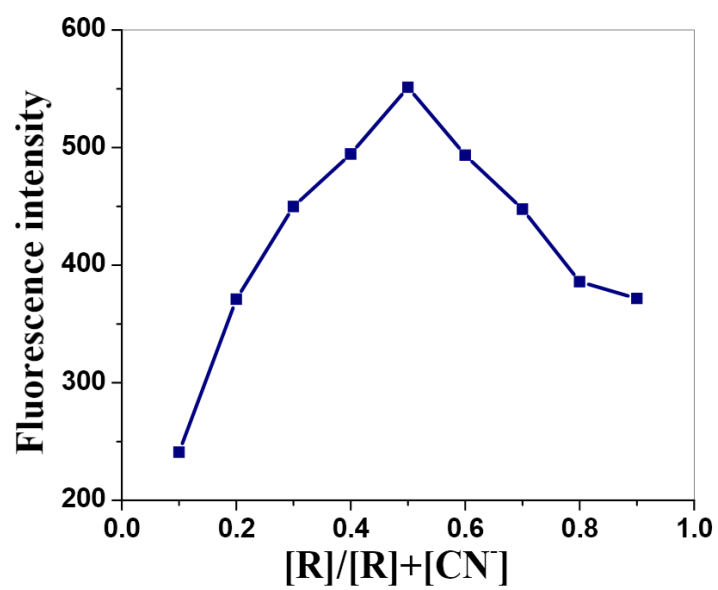

**Fig. S16.** Job's plot of S1 with F<sup>-</sup> and CN<sup>-</sup> ion.

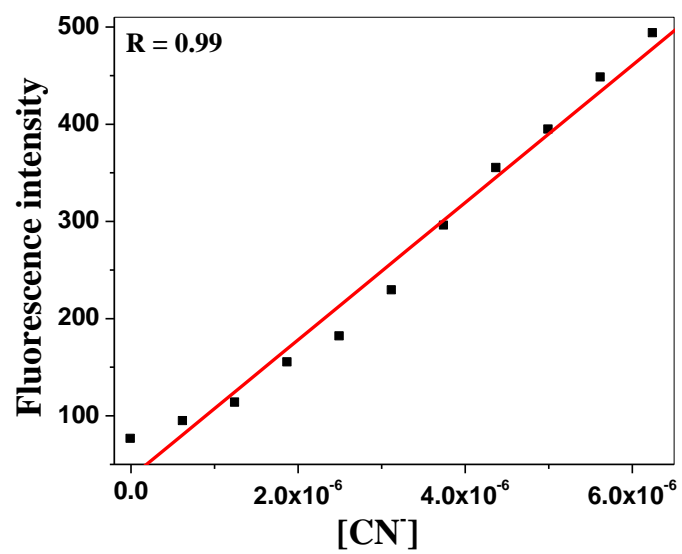

**Fig. S17.** Detection limit plot of **S1-CN<sup>-</sup>** complex.

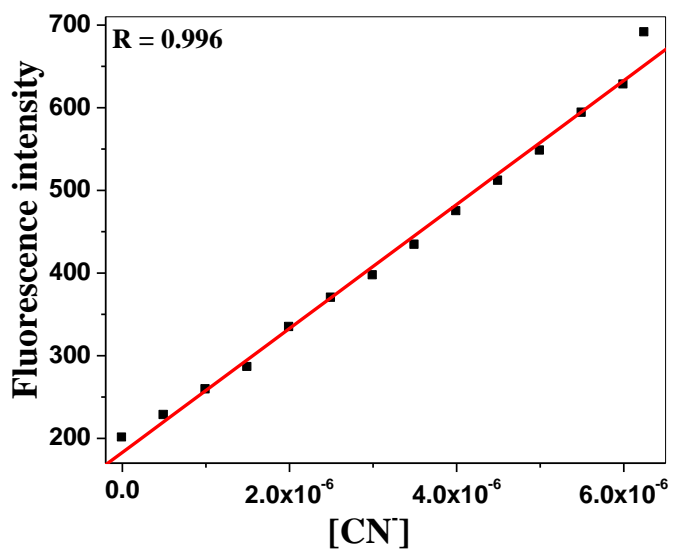

**Fig. S18.** Detection limit plot of S2-CN<sup>-</sup> complex.

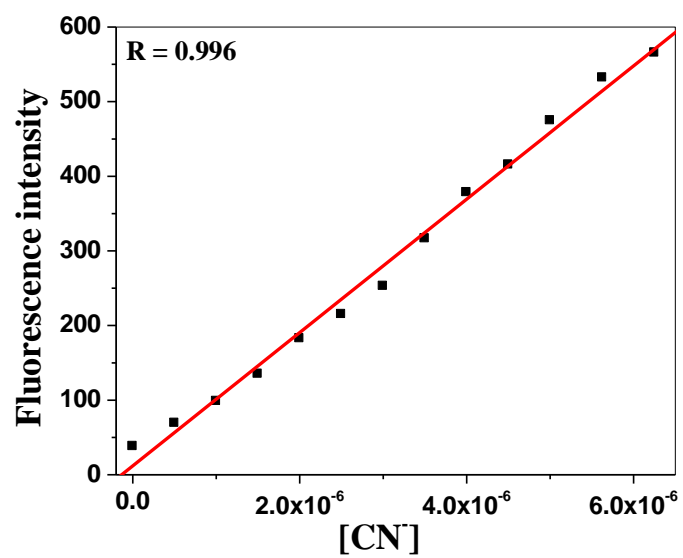

**Fig. S19.** Detection limit plot of S3-CN<sup>-</sup> complex.



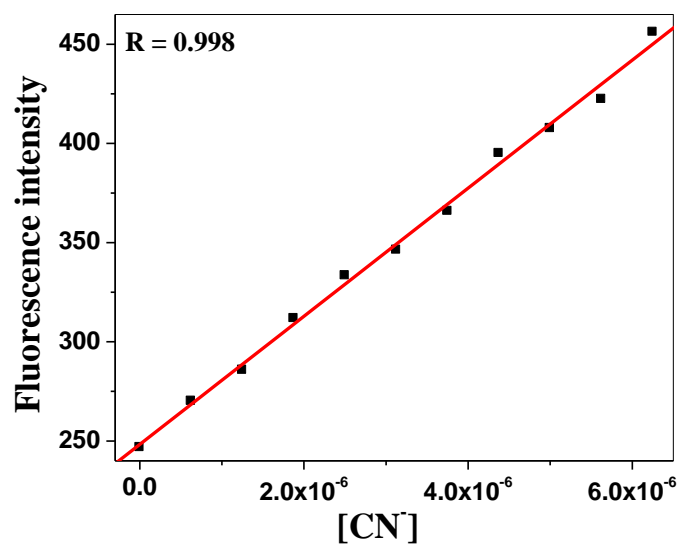

**Fig. S20.** Detection limit plot of S4-CN<sup>-</sup> complex.

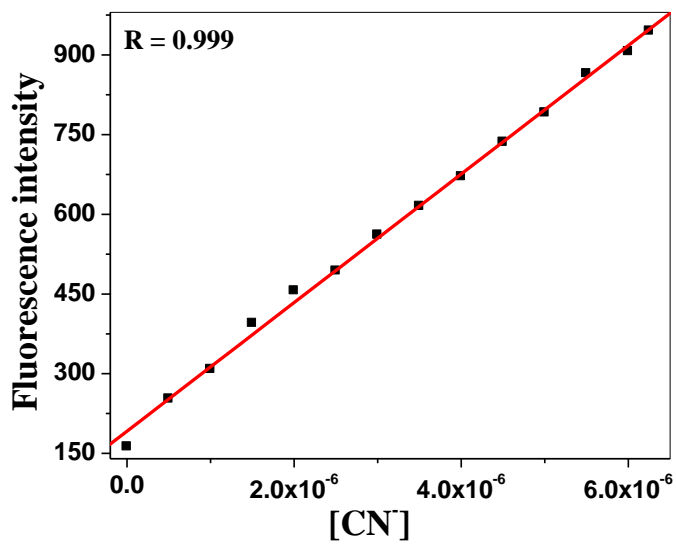

**Fig. S21.** Detection limit plot of S5-CN<sup>-</sup> complex.

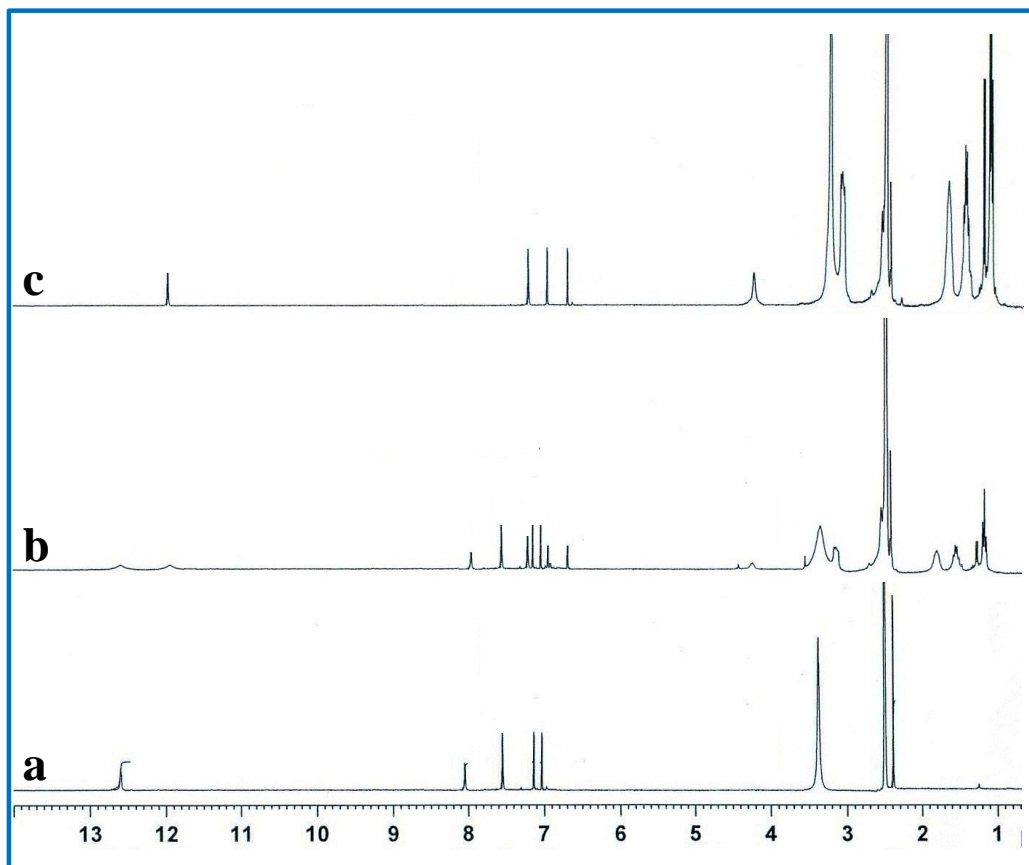

**Fig. S22.**  $^1\text{H}$  NMR spectrum of **S2** with addition of (a) 0 eqv. (b) 0.5 eqv. (c) 1.0 eqv. of TBACN in  $\text{DMSO-d}_6$ .

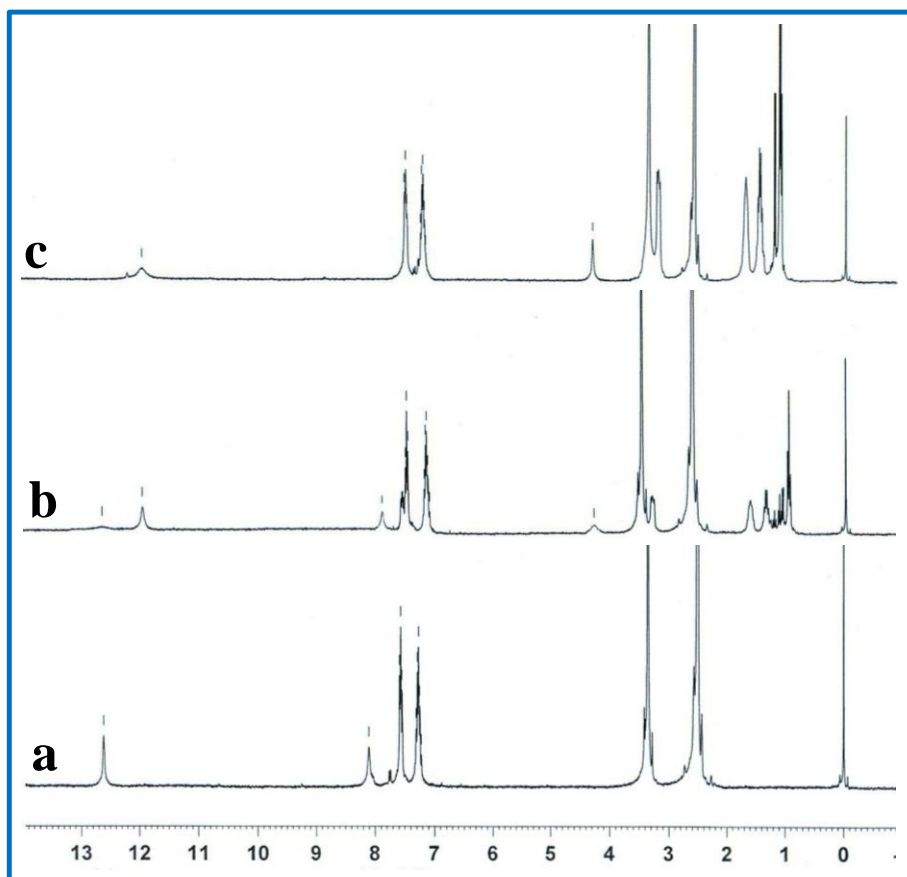

**Fig. S23.**  $^1\text{H}$  NMR spectrum of **S3** with addition of (a) 0 eqv. (b) 0.5 eqv. (c) 1.0 eqv. of TBACN in  $\text{DMSO-d}_6$ .

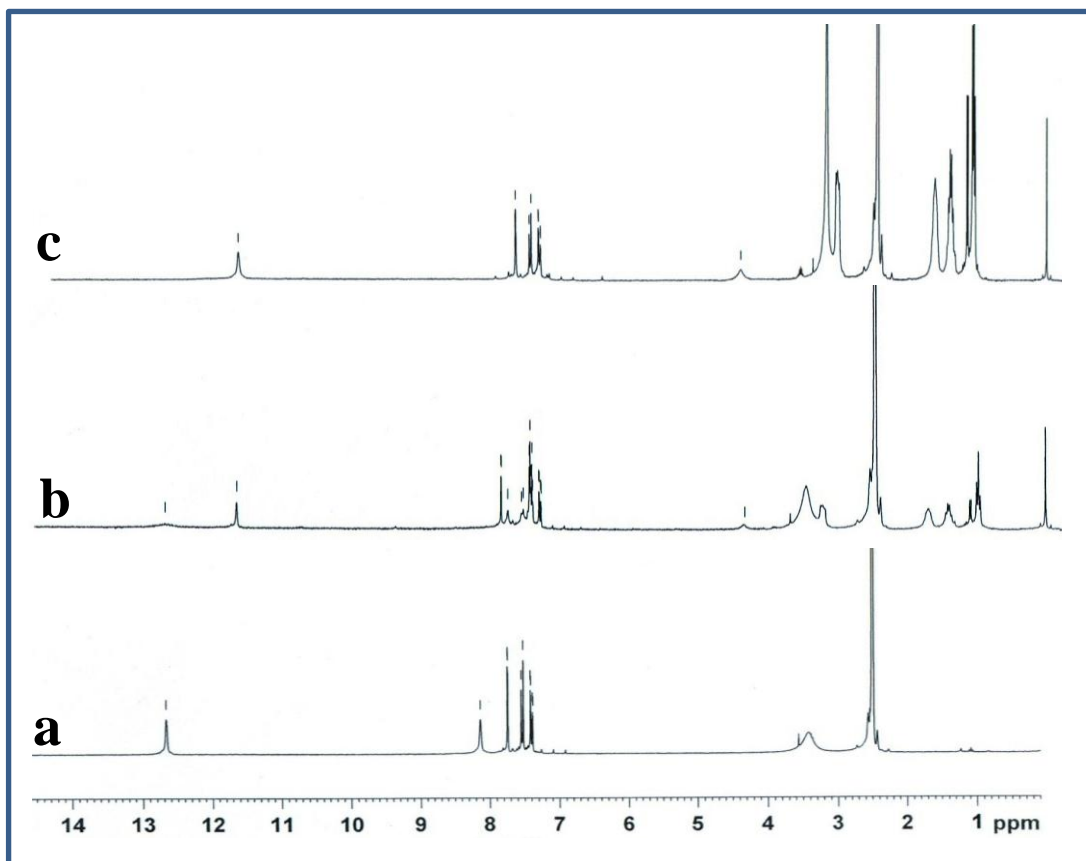

**Fig. S24.**  $^1\text{H}$  NMR spectrum of **S4** with addition of (a) 0 eqv. (b) 0.5 eqv. (c) 1.0 eqv. of TBACN in  $\text{DMSO-d}_6$ .

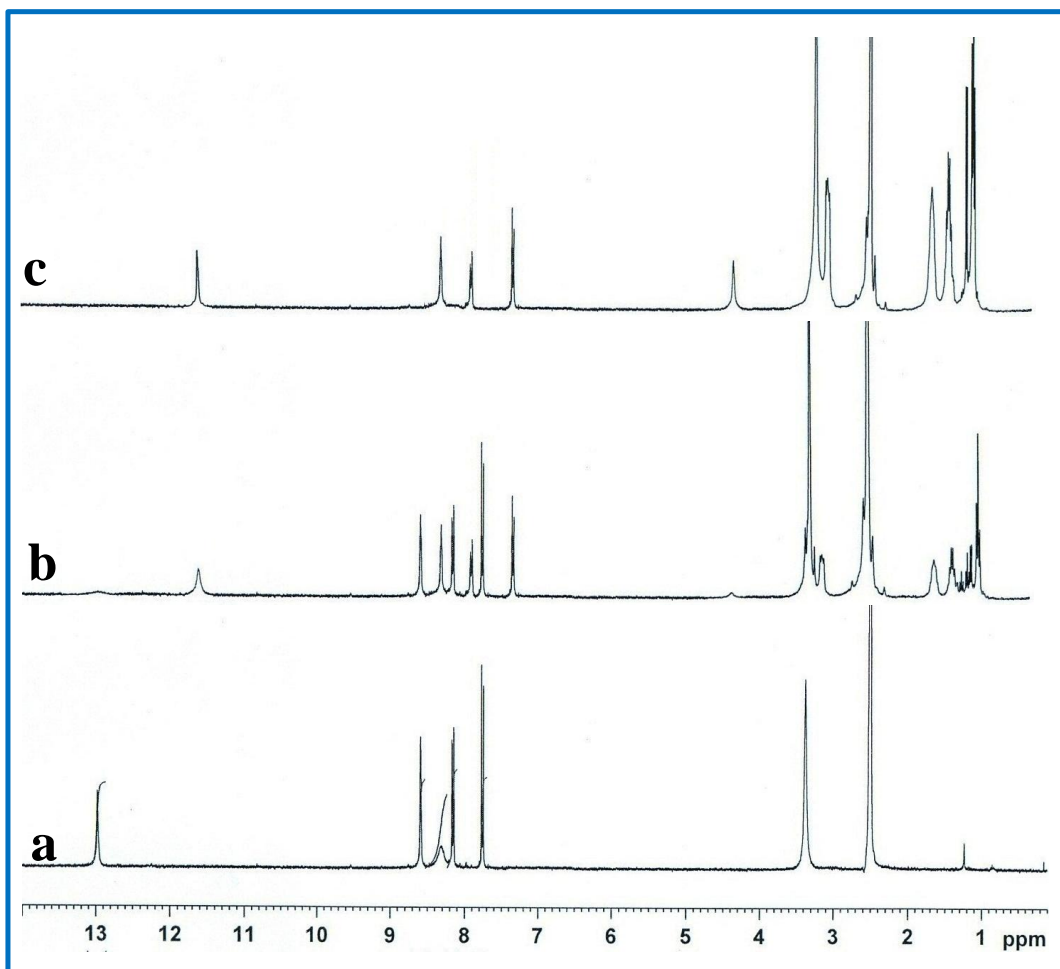

**Fig. S25.**  $^1\text{H}$  NMR spectrum of **S5** with addition of (a) 0 eqv. (b) 0.5 eqv. (c) 1.0 eqv. of TBACN in  $\text{DMSO-d}_6$ .

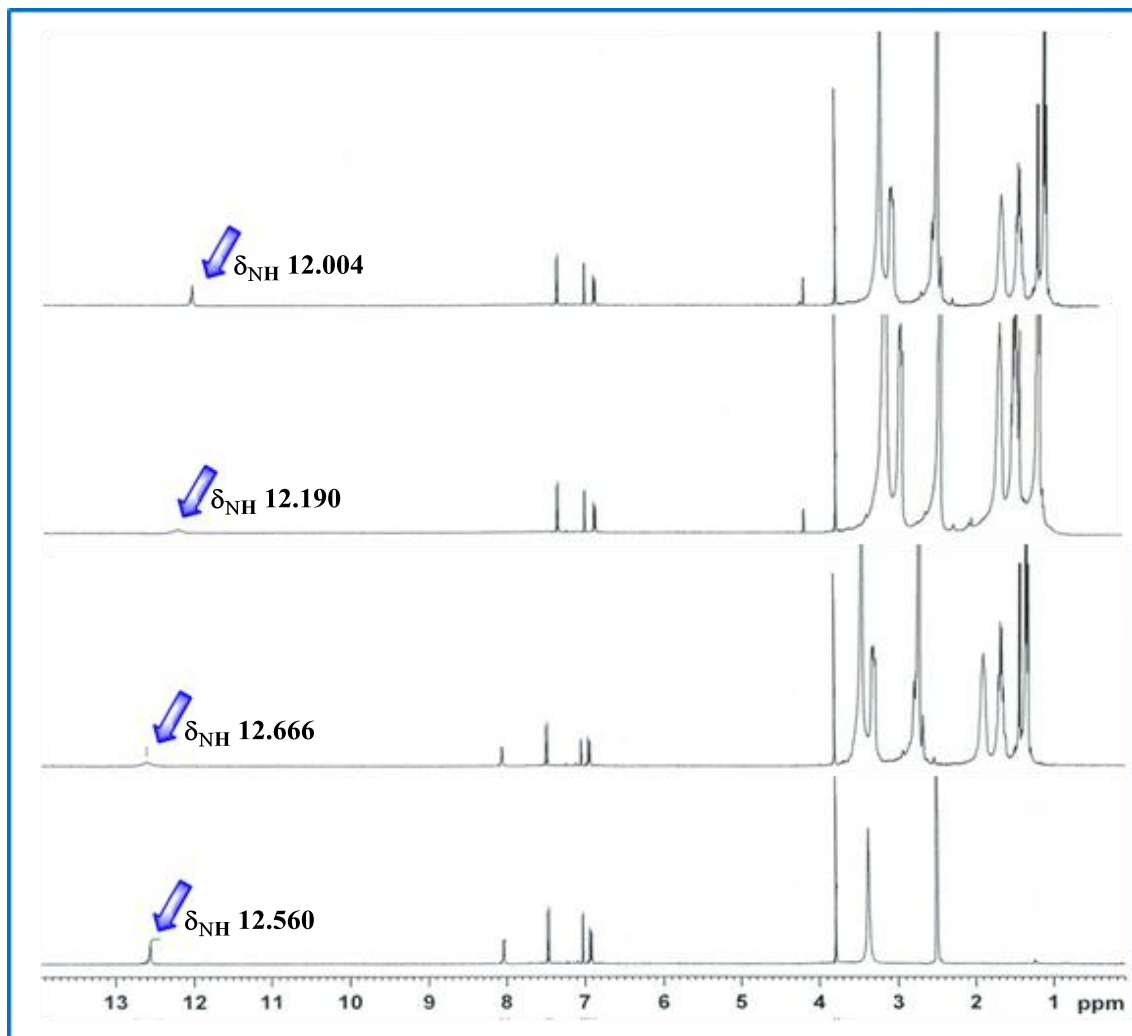

**Fig. S26.**  $^1\text{H}$  NMR spectrum of (a) free **S1** (b) **S1** + 0.5 eqv.  $\text{F}^-$  (c) **S1** + (0.5 eqv.  $\text{F}^-$ ) + 2 eqv.  $\text{CN}^-$  (d) **S1** + 1 eqv.  $\text{CN}^-$ .

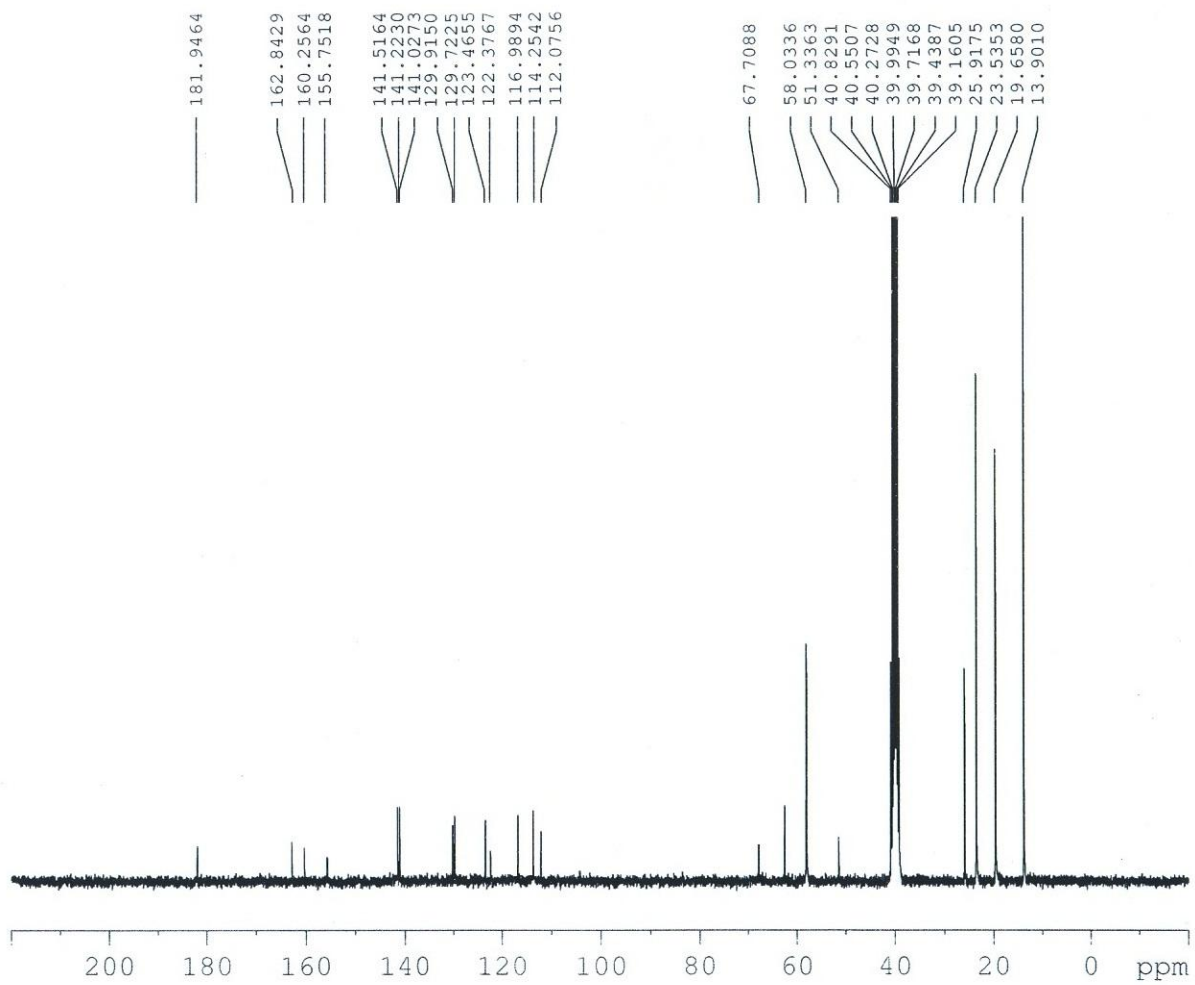

**Fig. S27.**  $^{13}\text{C}$  NMR spectrum of **S5** with addition of TBACN in  $\text{DMSO-d}_6$ .



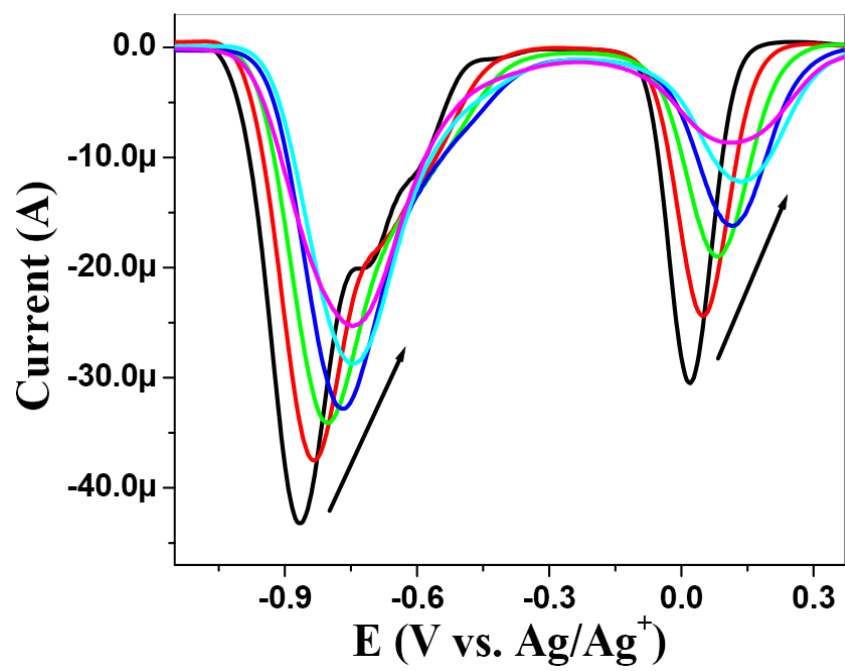

**Fig. S28.** Changes in redox properties of S2 upon addition of TBACN in ACN.

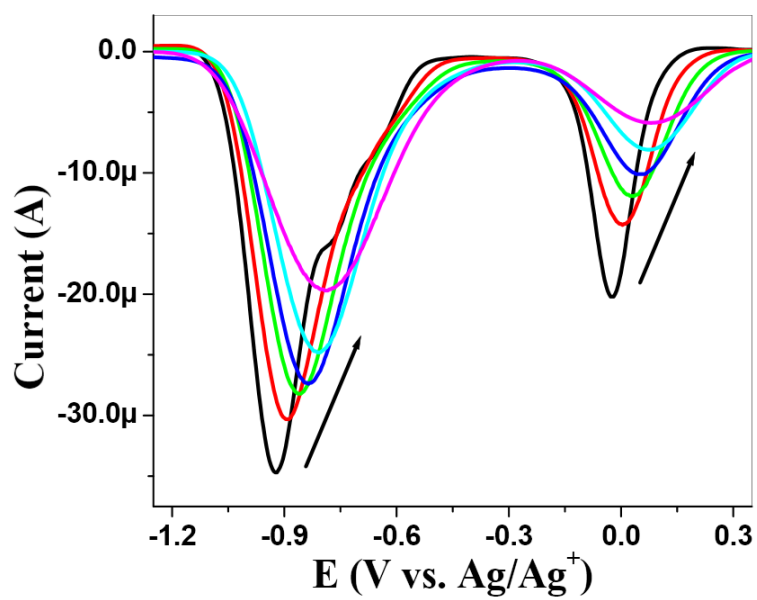

**Fig. S29.** Changes in redox properties of S3 upon addition of TBACN in ACN.

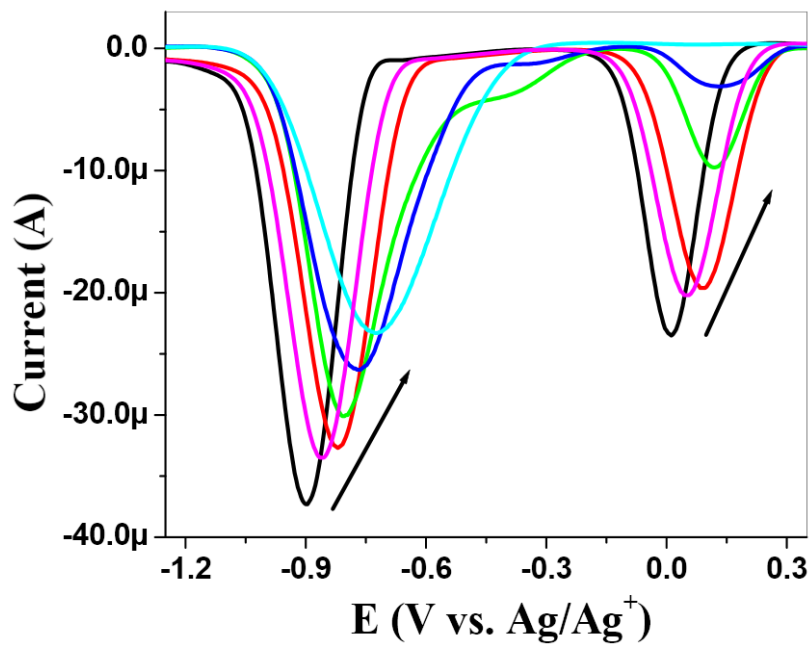

**Fig. S30.** Changes in redox properties of S4 upon addition of TBACN in ACN.

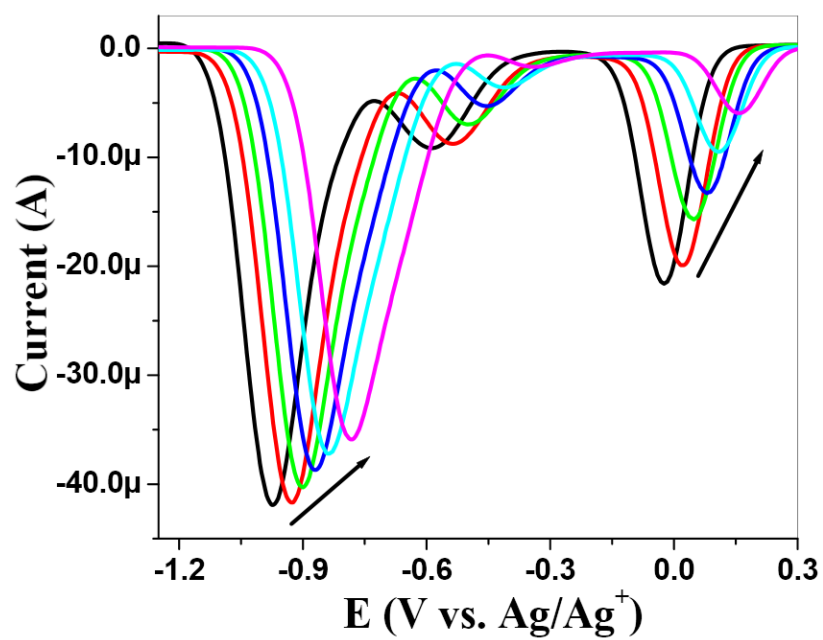

**Fig. S31.** Changes in redox properties of S5 upon addition of TBACN in ACN.

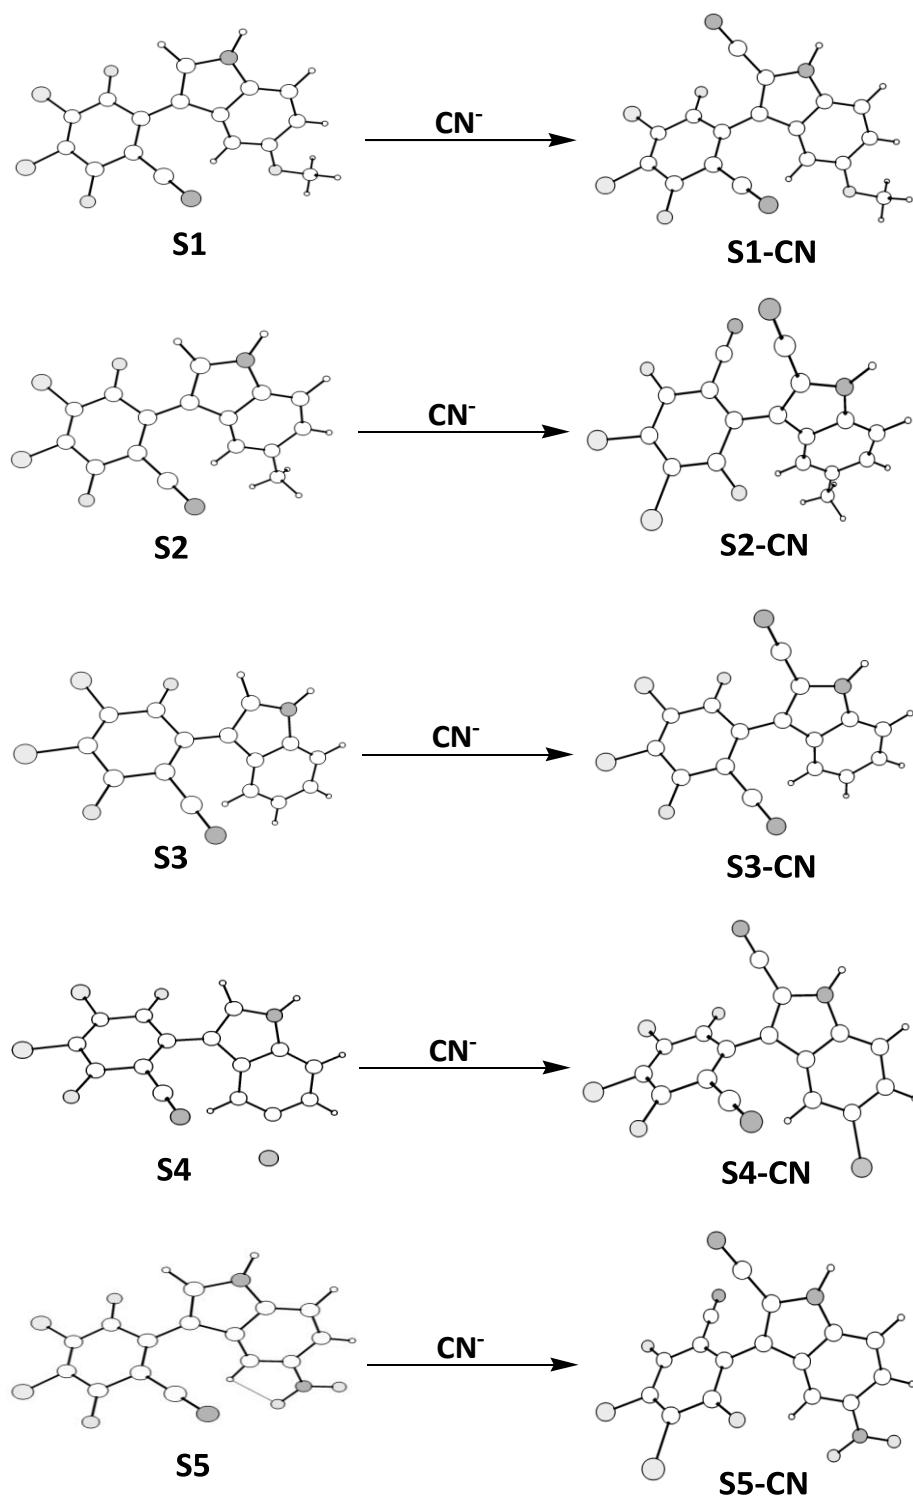

**Fig. S32.** Optimized structure for sensors **S1-S5** and its cyanide complex.

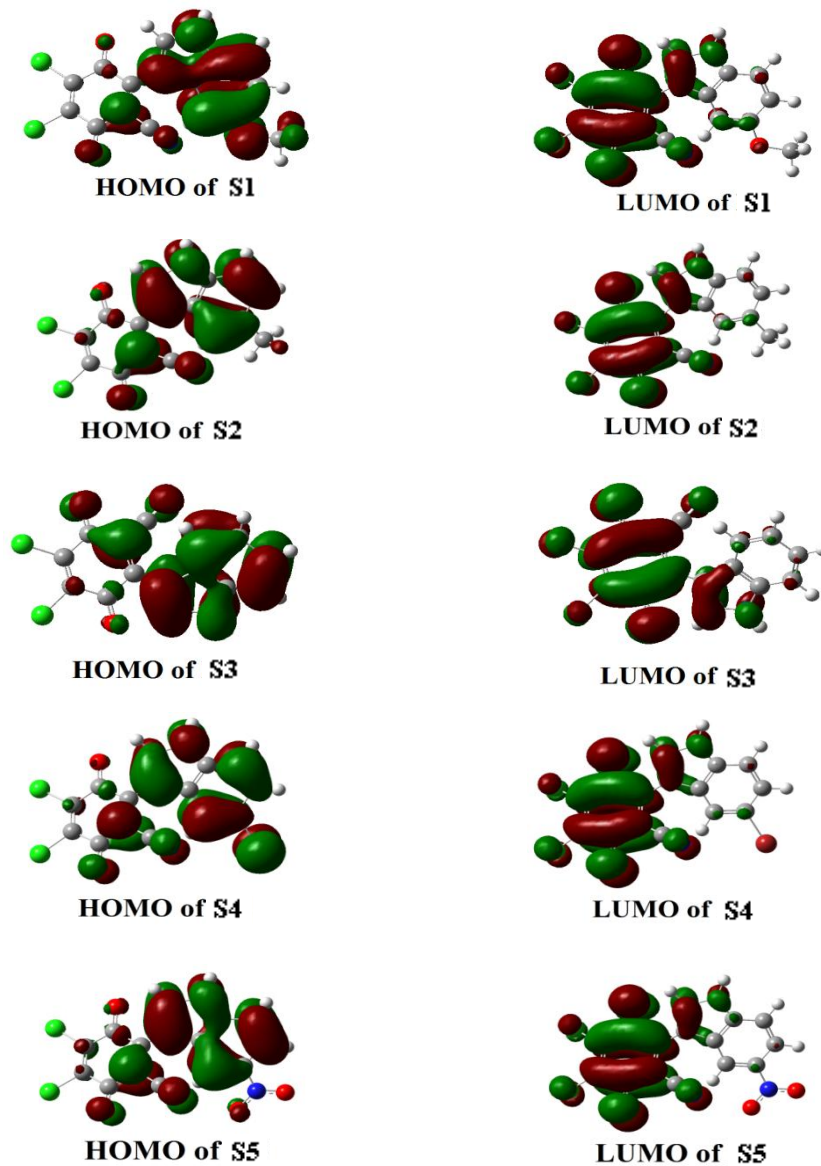

**Fig. S33.** Molecular orbitals (HOMO–LUMO) of sensors **S1-S5**.

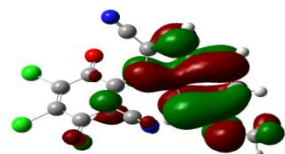

**HOMO of S1-CN**

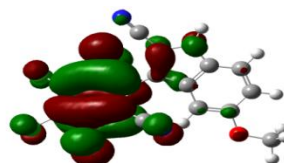

**LUMO of S1-CN**

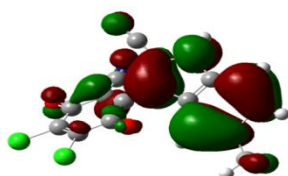

**HOMO of S2-CN**

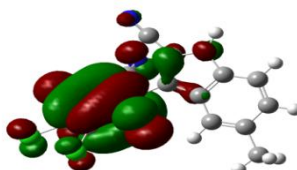

**LUMO of S2-CN**

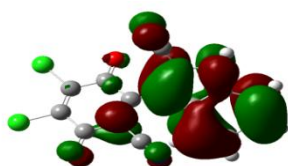

**HOMO of S3-CN**

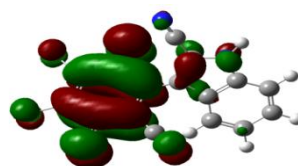

**LUMO of S3-CN**

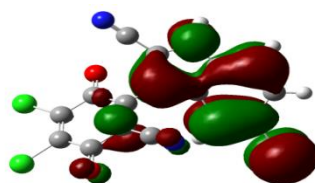

**HOMO of S4-CN**

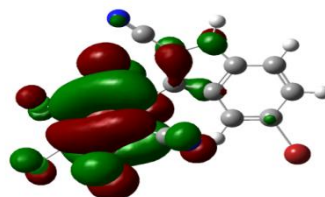

**LUMO of S4-CN**

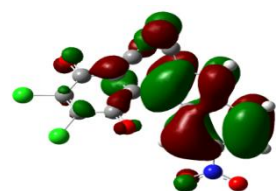

**HOMO of S5-CN**

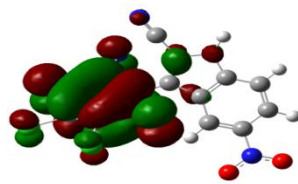

**LUMO of S5-CN**

**Fig. S34.** Molecular orbitals (HOMO –LUMO) of sensors–CN<sup>-</sup> complexes.

**Table S1.** Energies (in eV) of the MOs in free sensors and in sensor- CN<sup>-</sup> ion complexes.

| Sensor    | Free sensor       |                   |            | Sensor-anion complex |                   |            | $\Delta_{\Delta E}$ |
|-----------|-------------------|-------------------|------------|----------------------|-------------------|------------|---------------------|
|           | E <sub>HOMO</sub> | E <sub>LUMO</sub> | $\Delta E$ | E <sub>HOMO</sub>    | E <sub>LUMO</sub> | $\Delta E$ |                     |
| <b>S1</b> | -6.2562           | -4.3756           | 1.8806     | -6.5452              | -4.7027           | 1.8425     | 0.0381              |
| <b>S2</b> | -6.5226           | -4.4371           | 2.0855     | -6.8682              | -4.8184           | 2.0498     | 0.0357              |
| <b>S3</b> | -6.5898           | -4.4834           | 2.1064     | -6.9876              | -4.8175           | 2.1701     | -0.0637             |
| <b>S4</b> | -6.7849           | -4.6129           | 2.1720     | -7.1398              | -4.9280           | 2.2118     | -0.0398             |
| <b>S5</b> | -7.1738           | -4.8331           | 2.3407     | -7.5896              | -5.1550           | 2.4346     | -0.0939             |



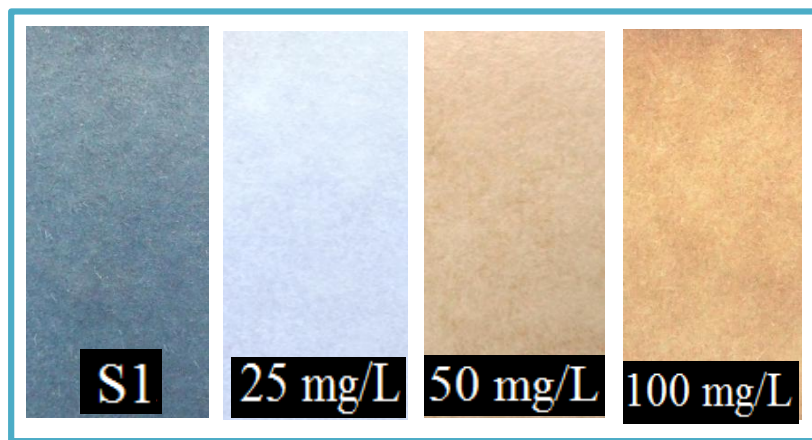

**Fig. S35.** Color change of test strips upon dipping in solution of NaCN in deep well water.

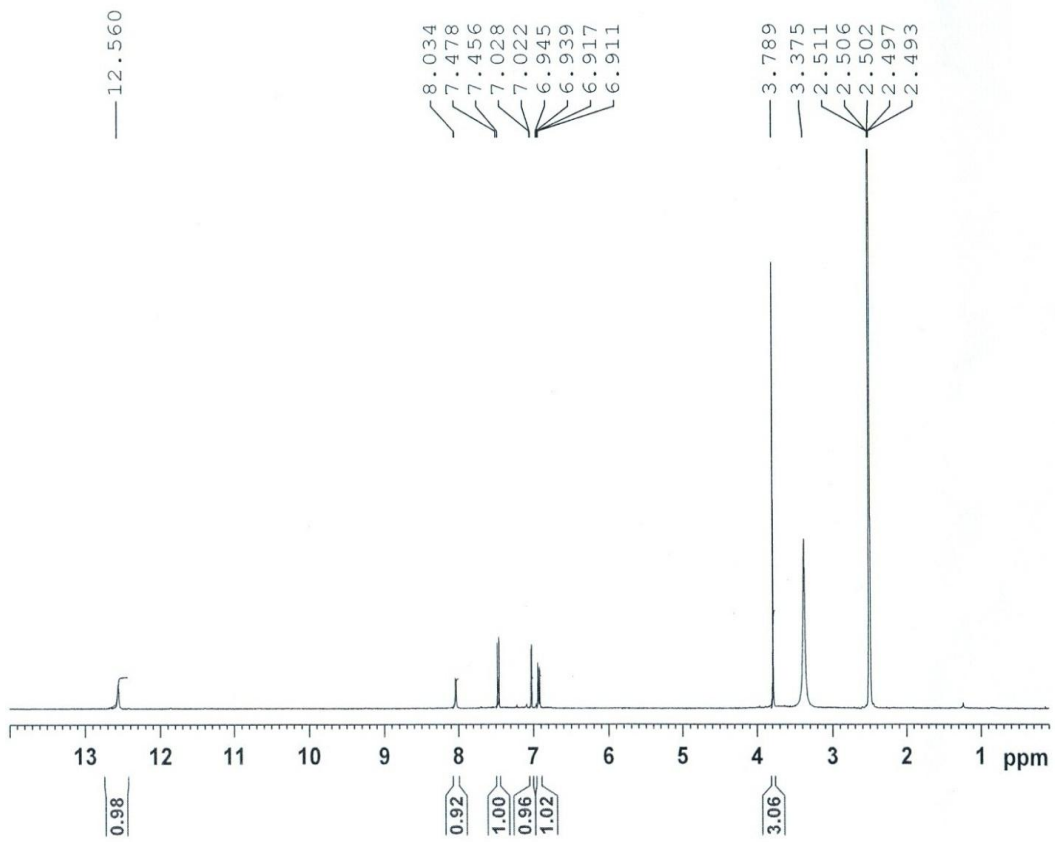

**Fig. S36.**  $^1\text{H}$  NMR spectrum of **S1** in  $\text{DMSO-d}_6$ .

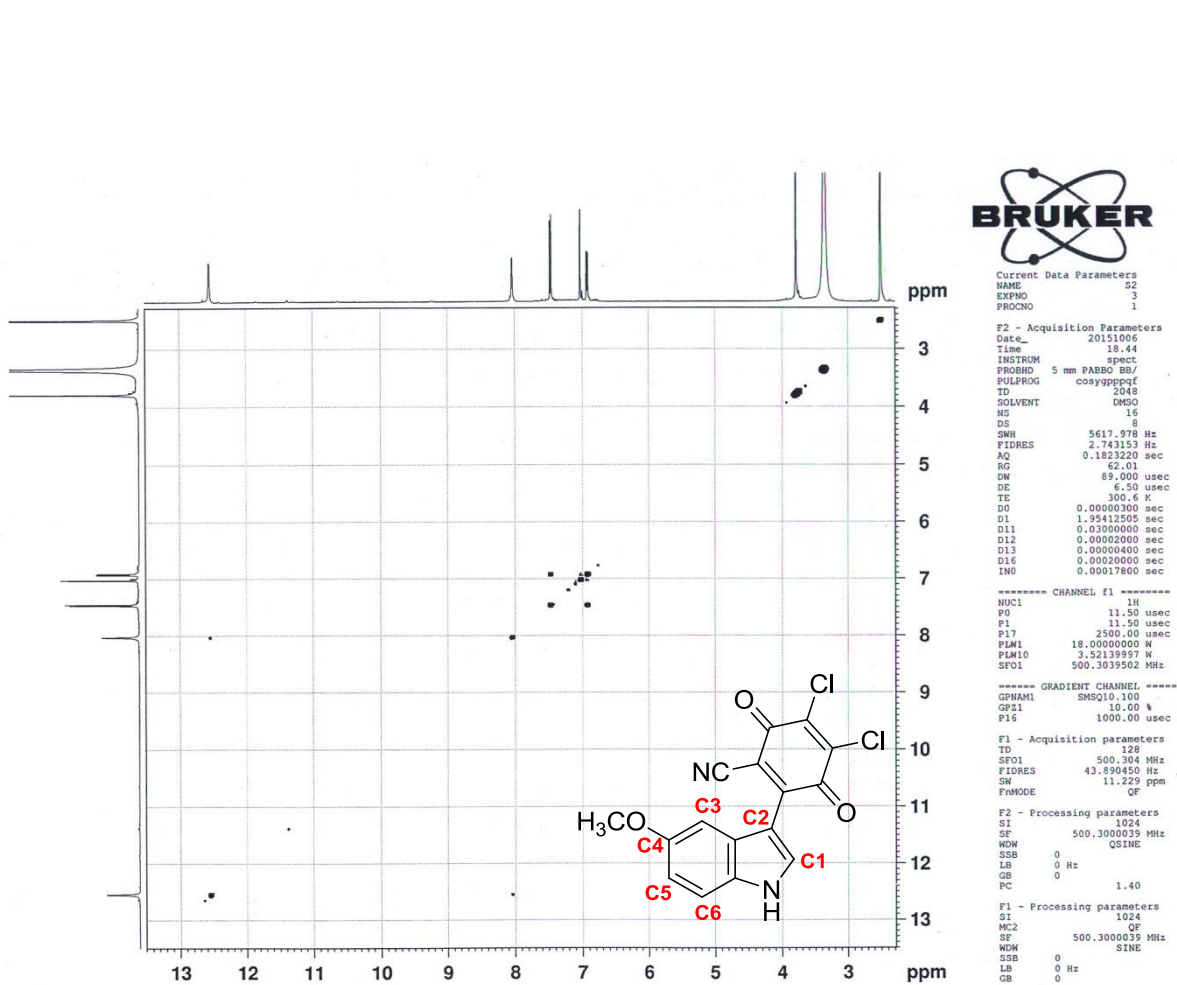

Fig. S37.  $^1\text{H}$ - $^1\text{H}$  COSY spectrum of **S1** in  $\text{DMSO-d}_6$ .

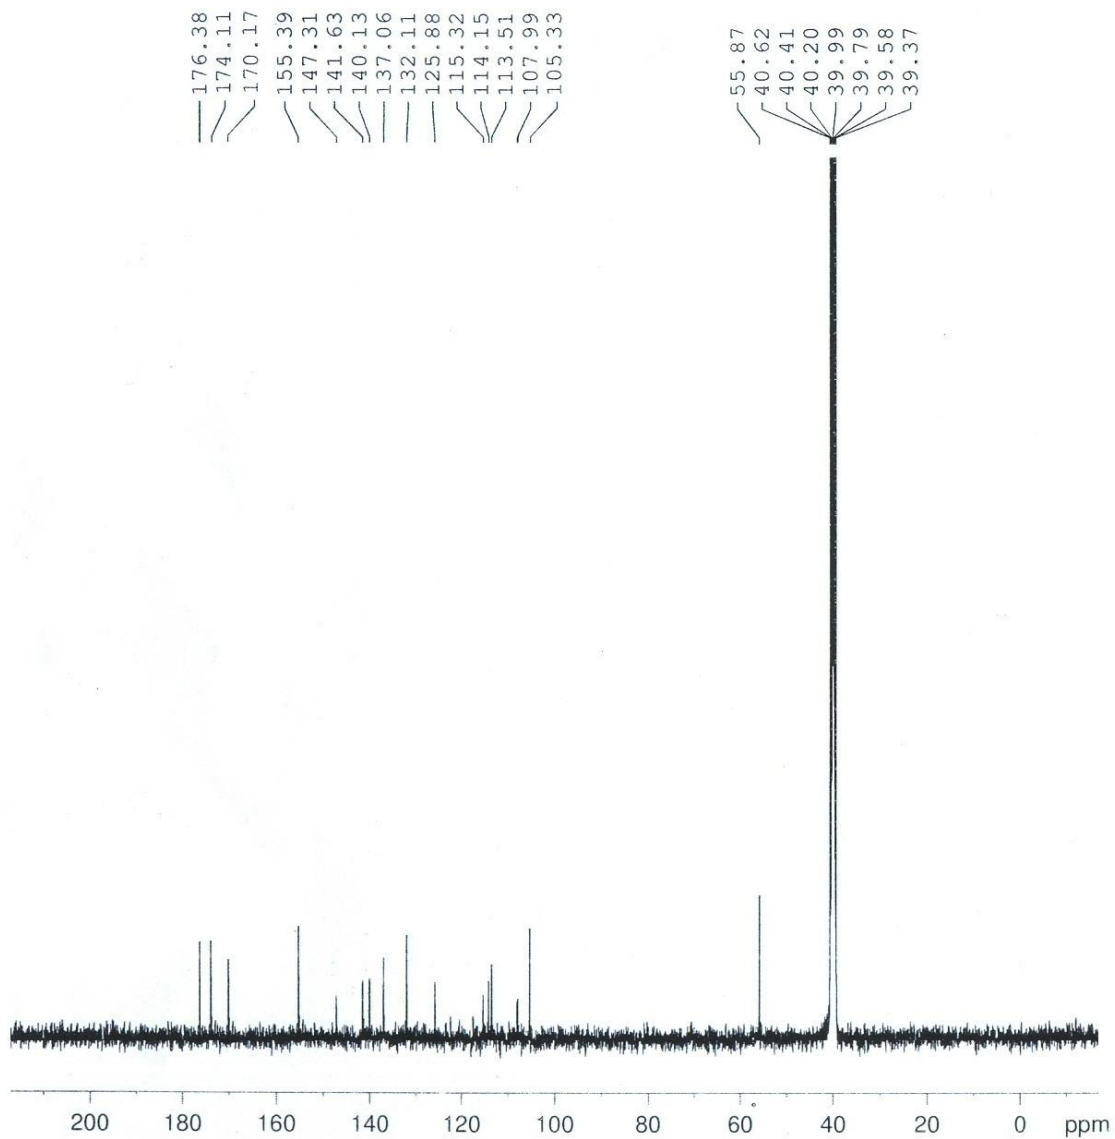

**Fig. S38.**  $^{13}\text{C}$  NMR spectrum of **S1** in  $\text{DMSO-d}_6$ .

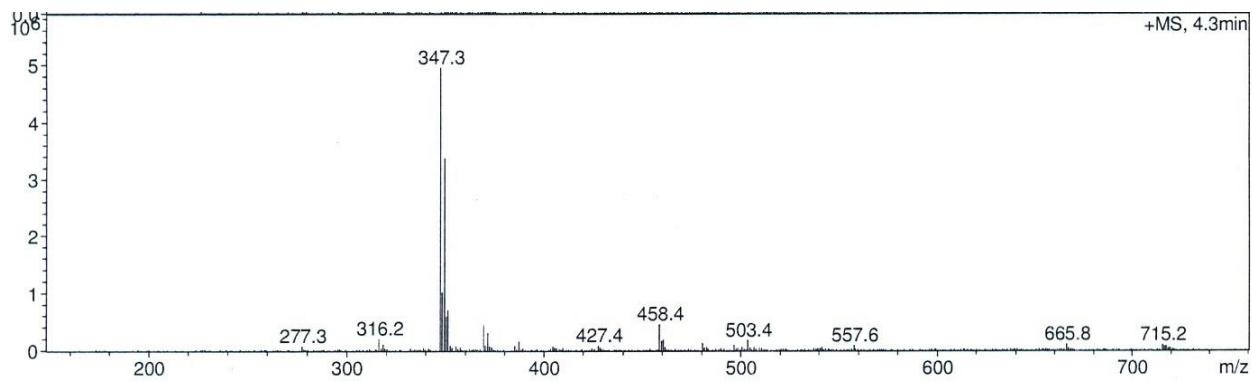

**Fig. S39.** LCMS spectrum of **S1**.

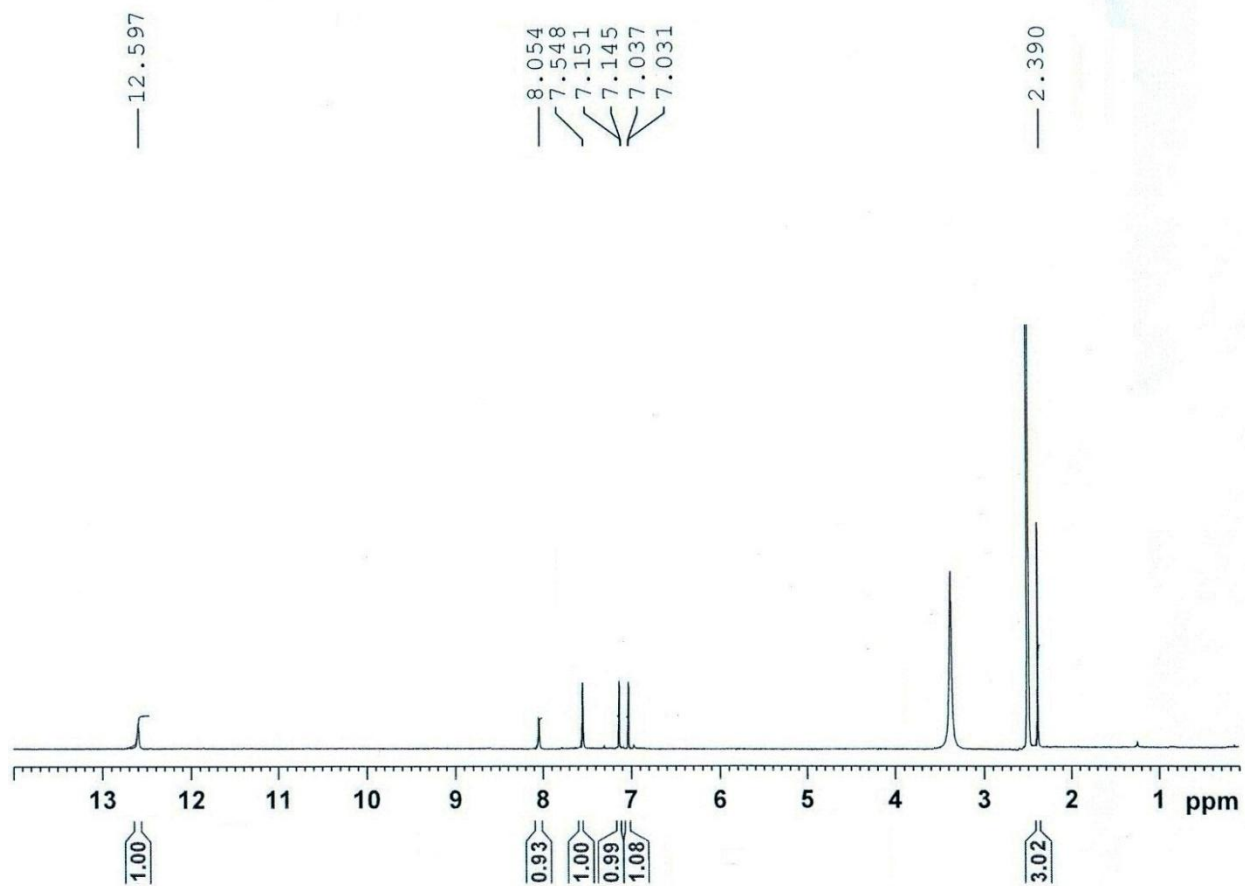

**Fig. S40.**  $^1\text{H}$  NMR spectrum of **S2** in  $\text{DMSO-d}_6$ .

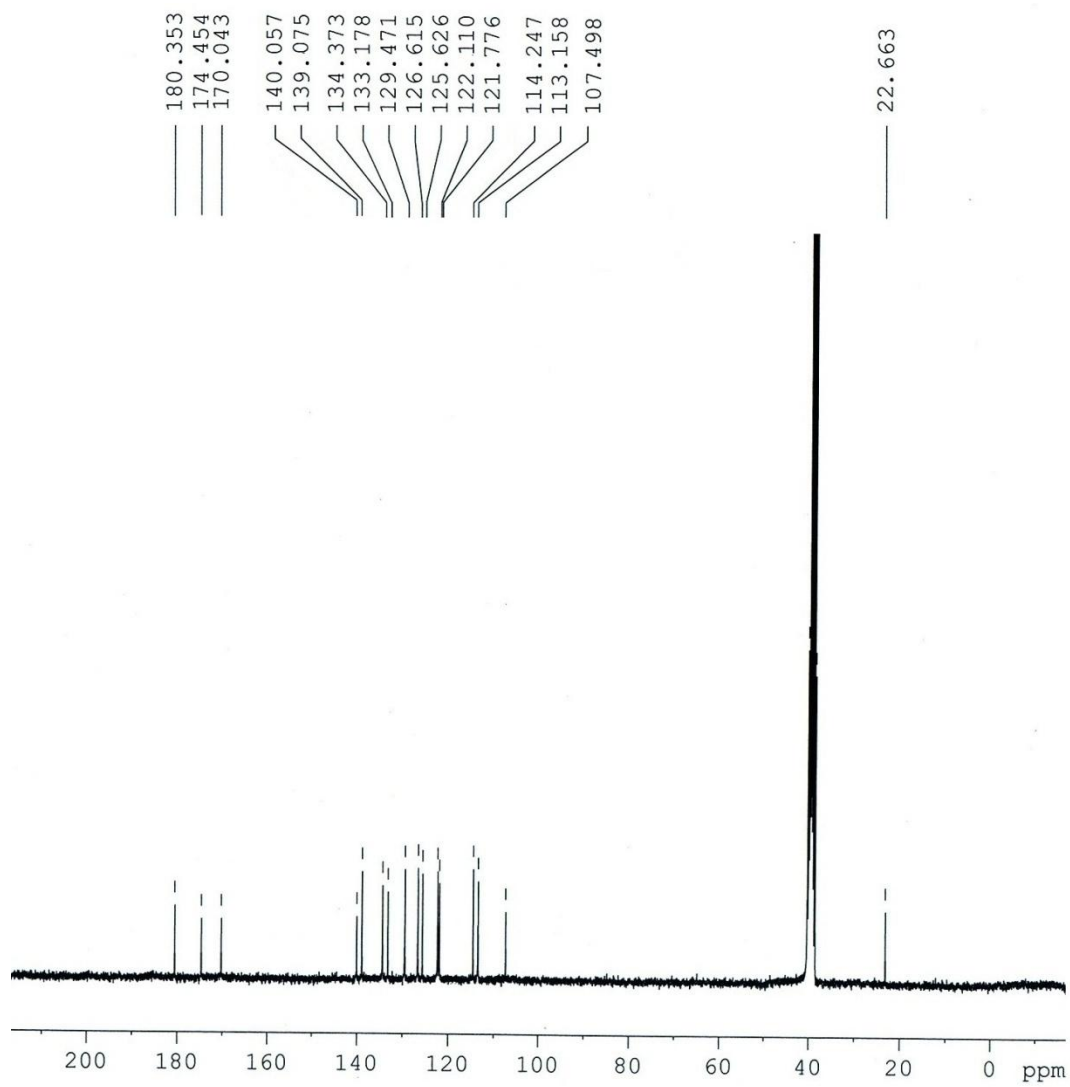

**Fig. S41.**  $^{13}\text{C}$  NMR spectrum of **S2** in  $\text{DMSO-d}_6$ .

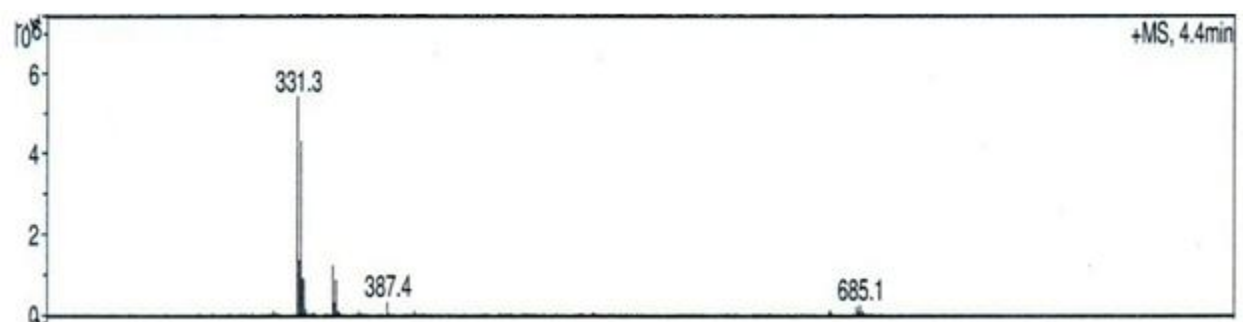

**Fig. S42.** LCMS spectrum of **S2**.



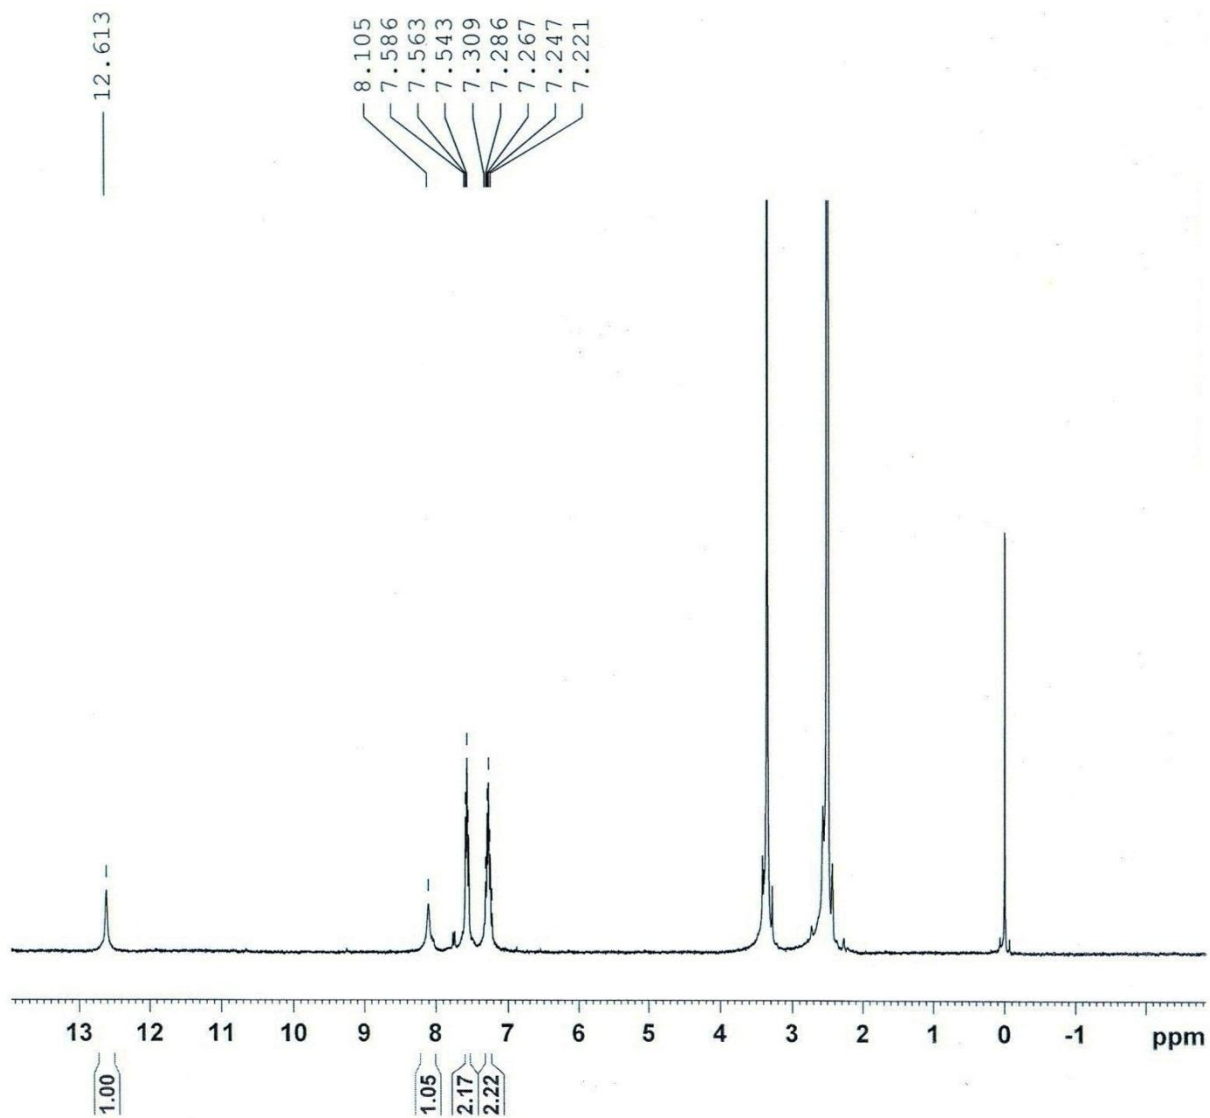

**Fig. S43.**  $^1\text{H}$  NMR spectrum of **S3** in  $\text{DMSO-d}_6$ .

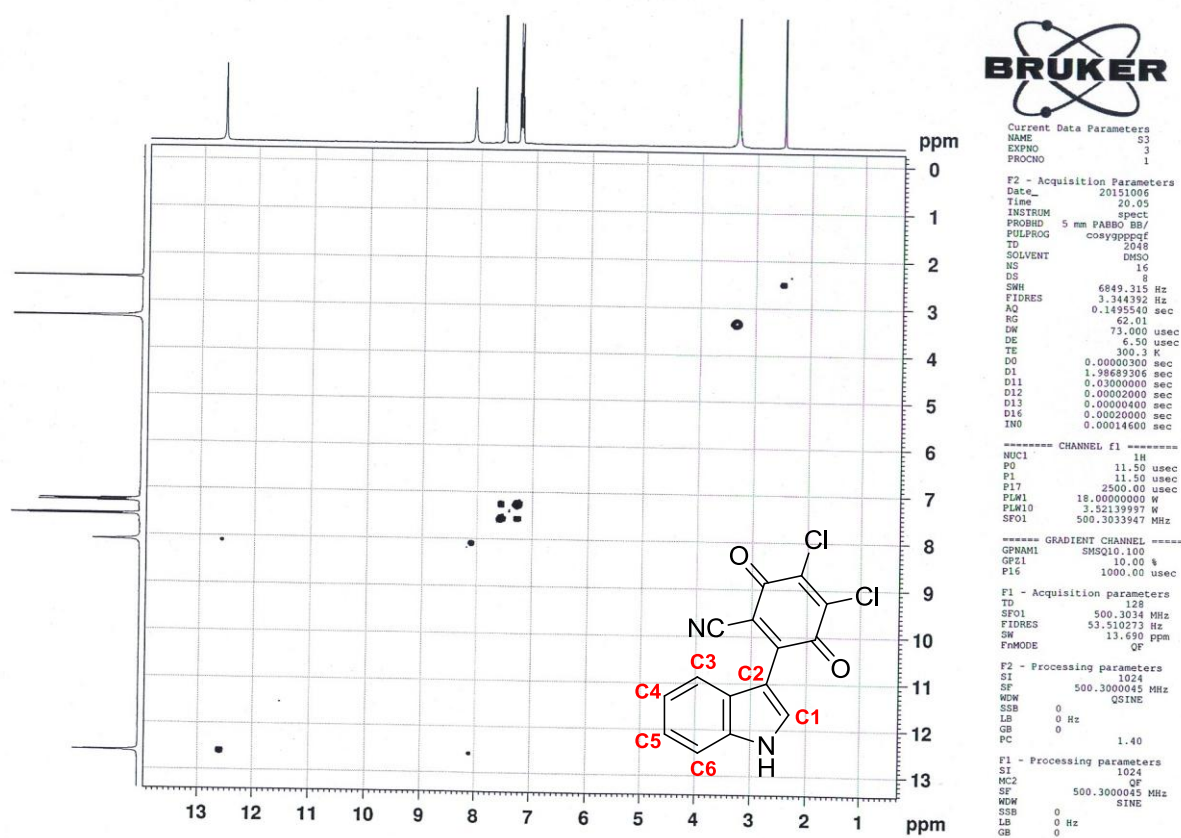

Fig. S44.  $^1\text{H}$ - $^1\text{H}$  COSY spectrum of **S3** in  $\text{DMSO-d}_6$ .

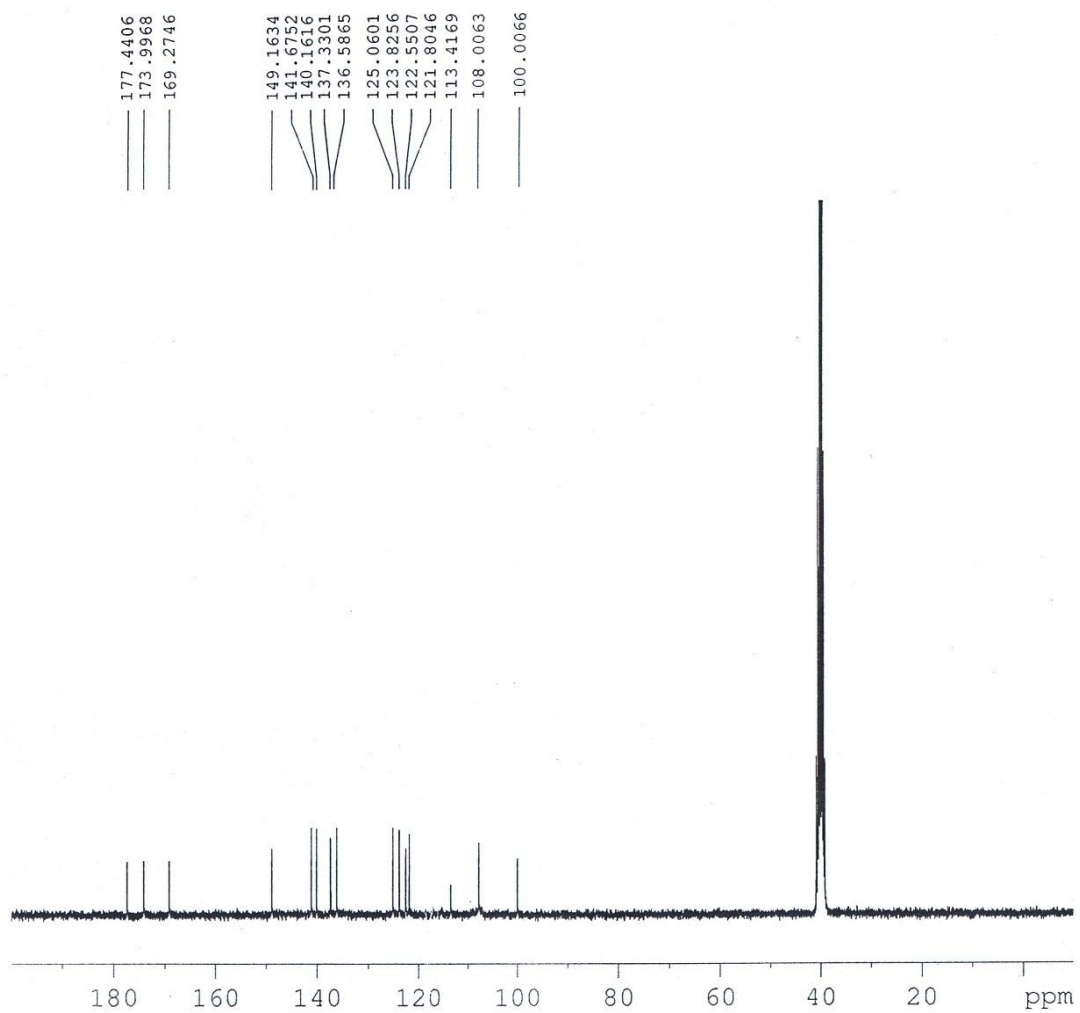

**Fig. S45.**  $^{13}\text{C}$  NMR spectrum of **S3** in  $\text{DMSO-d}_6$ .

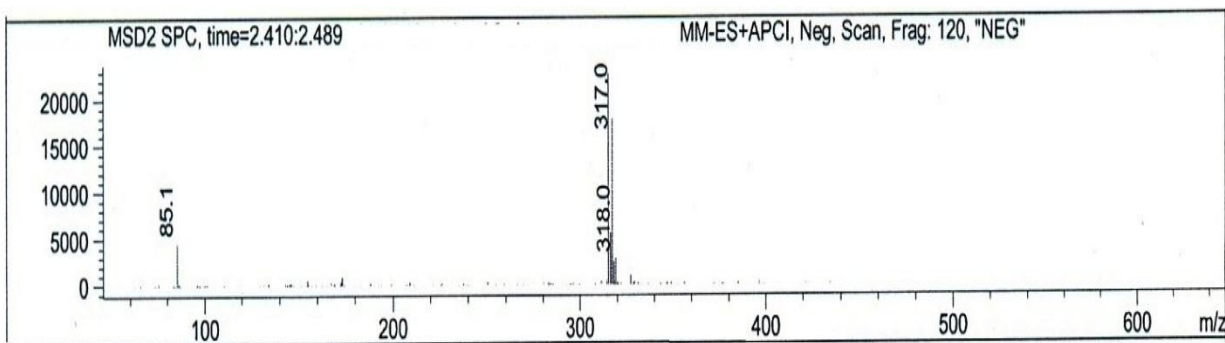

**Fig. S46.** LCMS spectrum of **S3**.

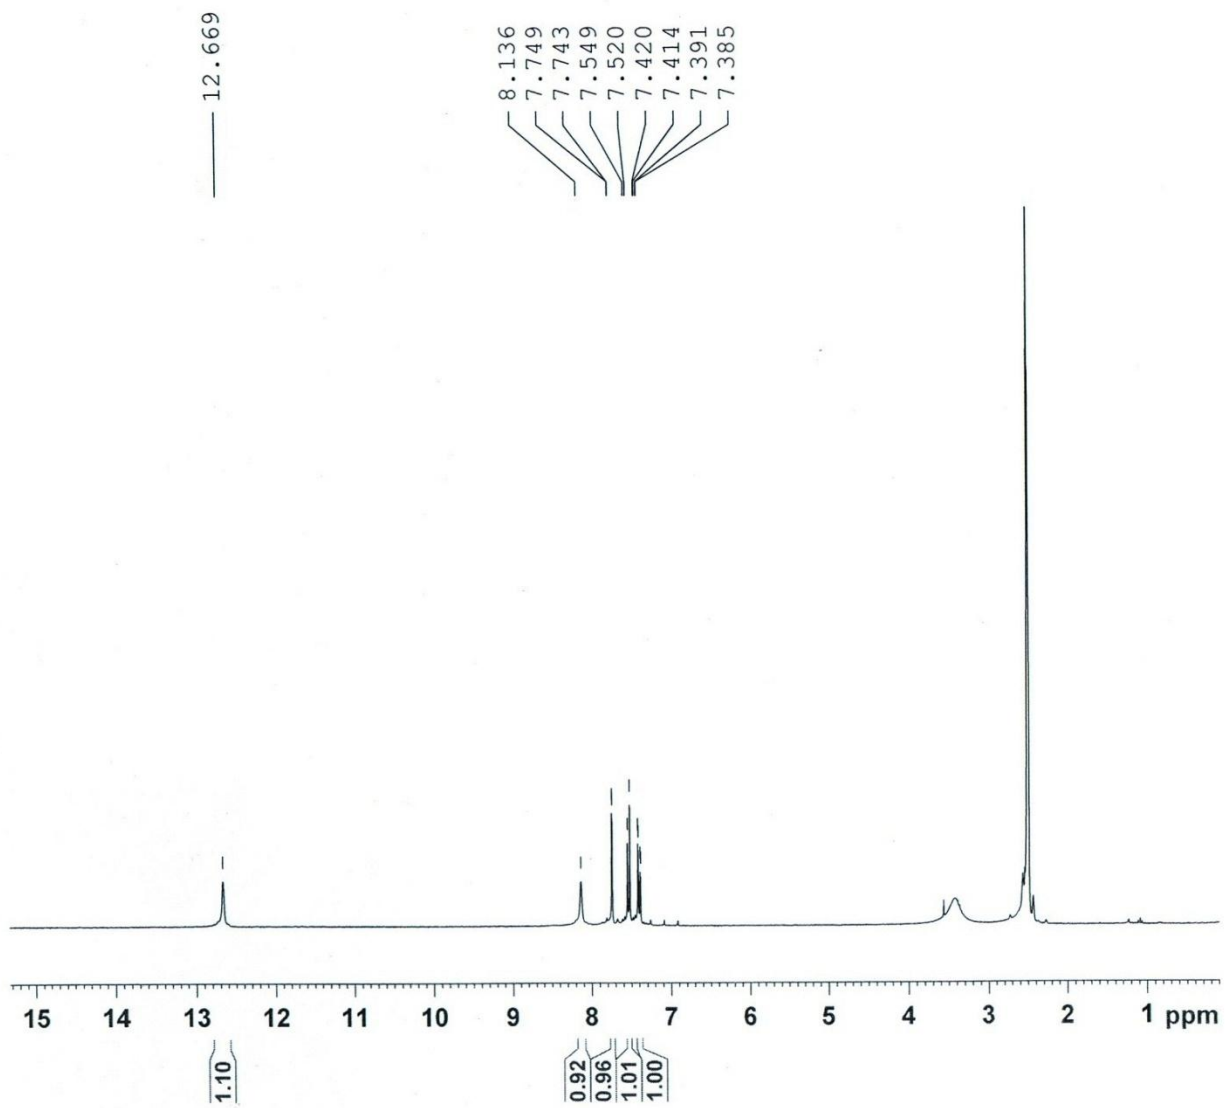

**Fig. S47.**  $^1\text{H}$  NMR spectrum of **S4** in  $\text{DMSO-d}_6$ .

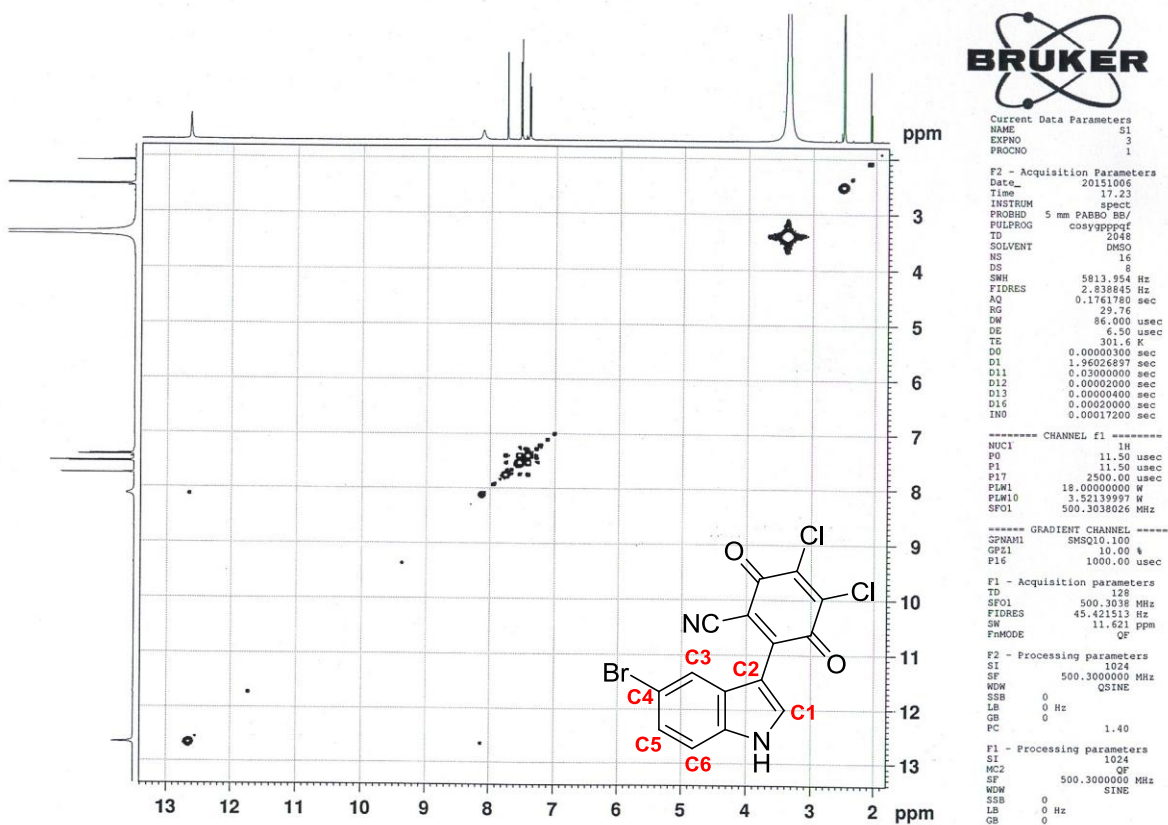

**Fig. S48.**  $^1\text{H}$ - $^1\text{H}$  COSY spectrum of **S4** in  $\text{DMSO-d}_6$ .

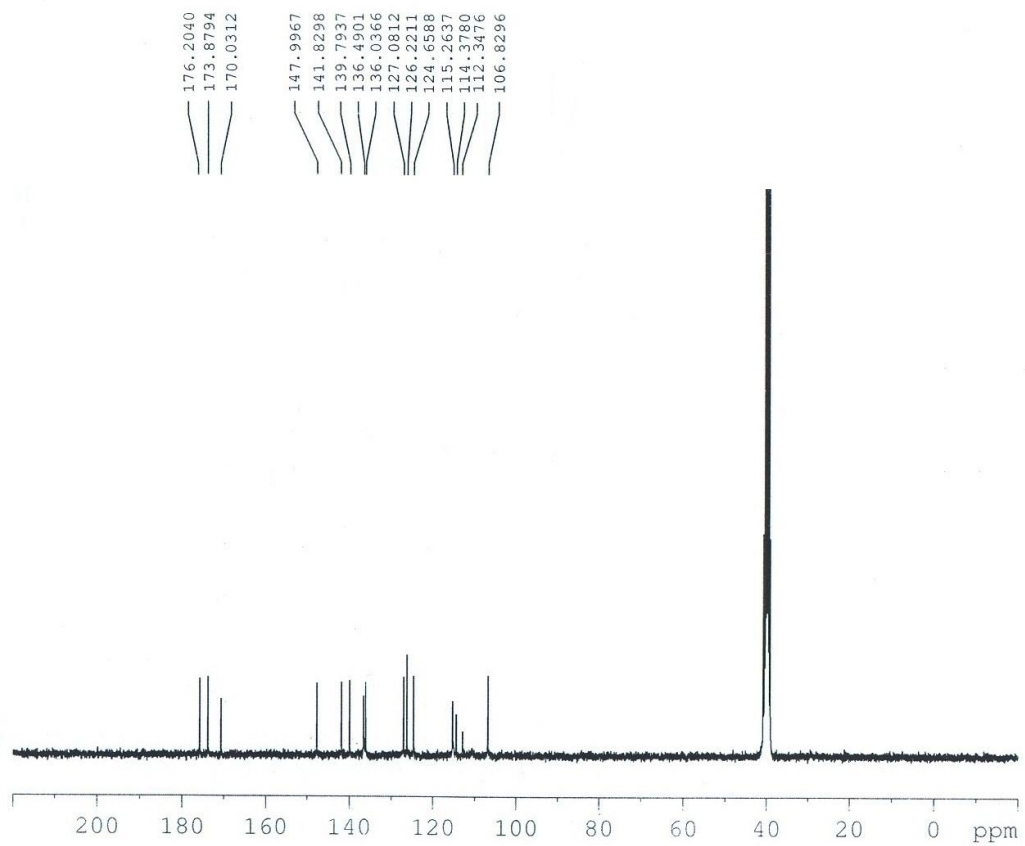

**Fig. S49.**  $^{13}\text{C}$  NMR spectrum of **S4** in  $\text{DMSO-d}_6$ .

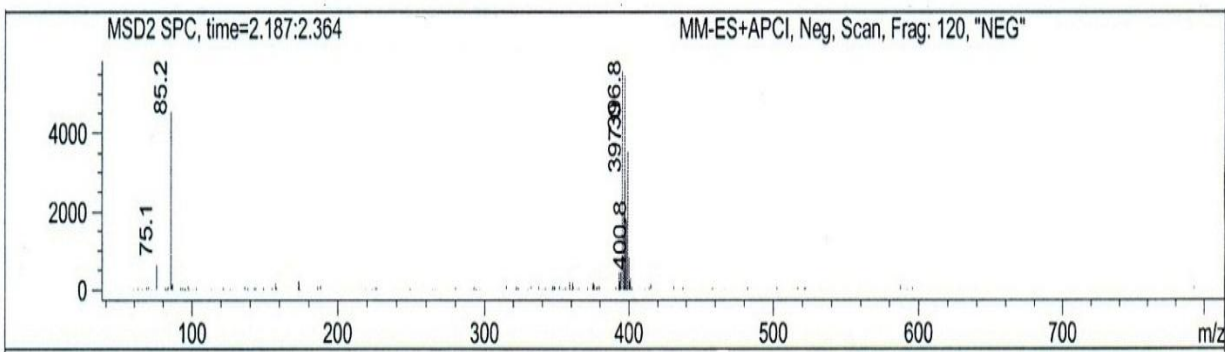

**Fig. S50.** LCMS spectrum of **S4**.



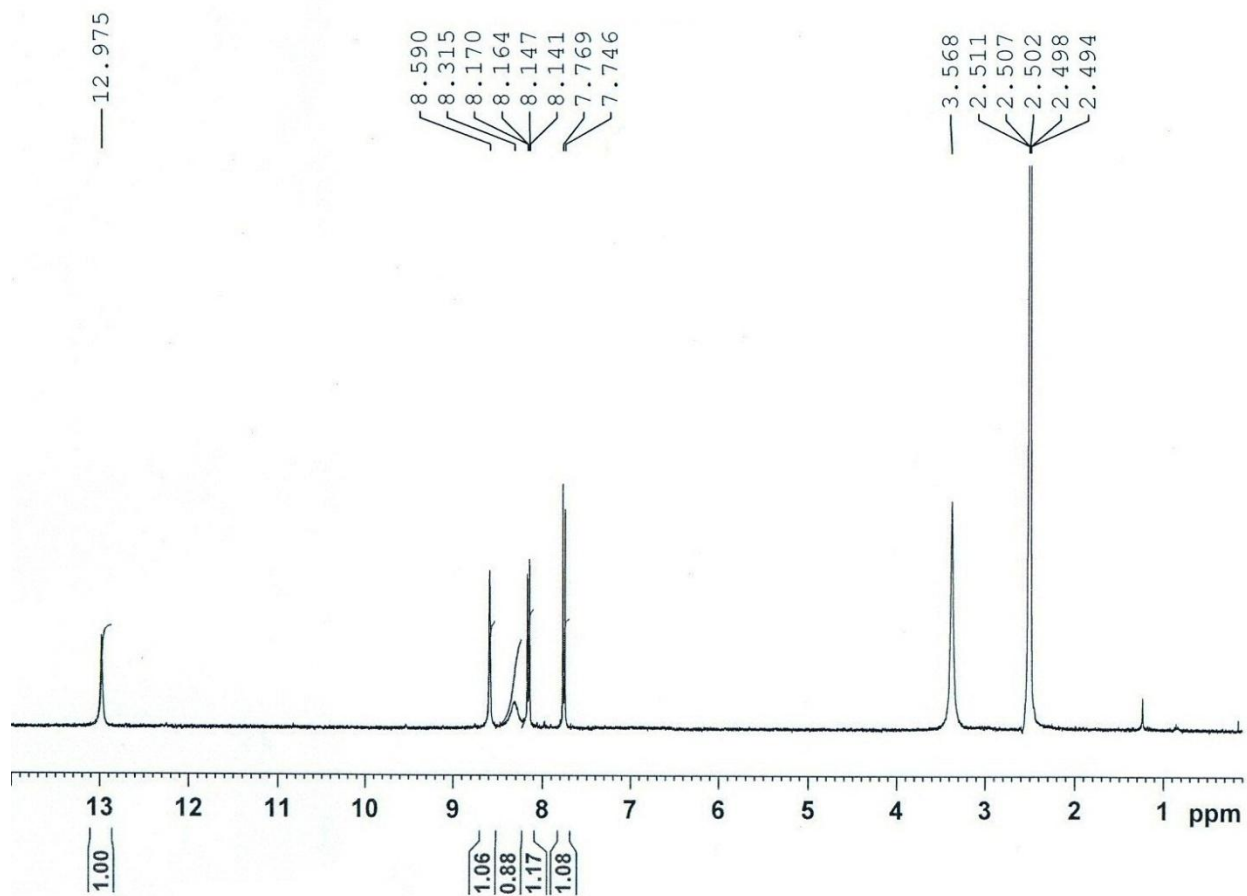

Fig. S51.  $^1\text{H}$  NMR spectrum of **S5** in  $\text{DMSO-d}_6$ .

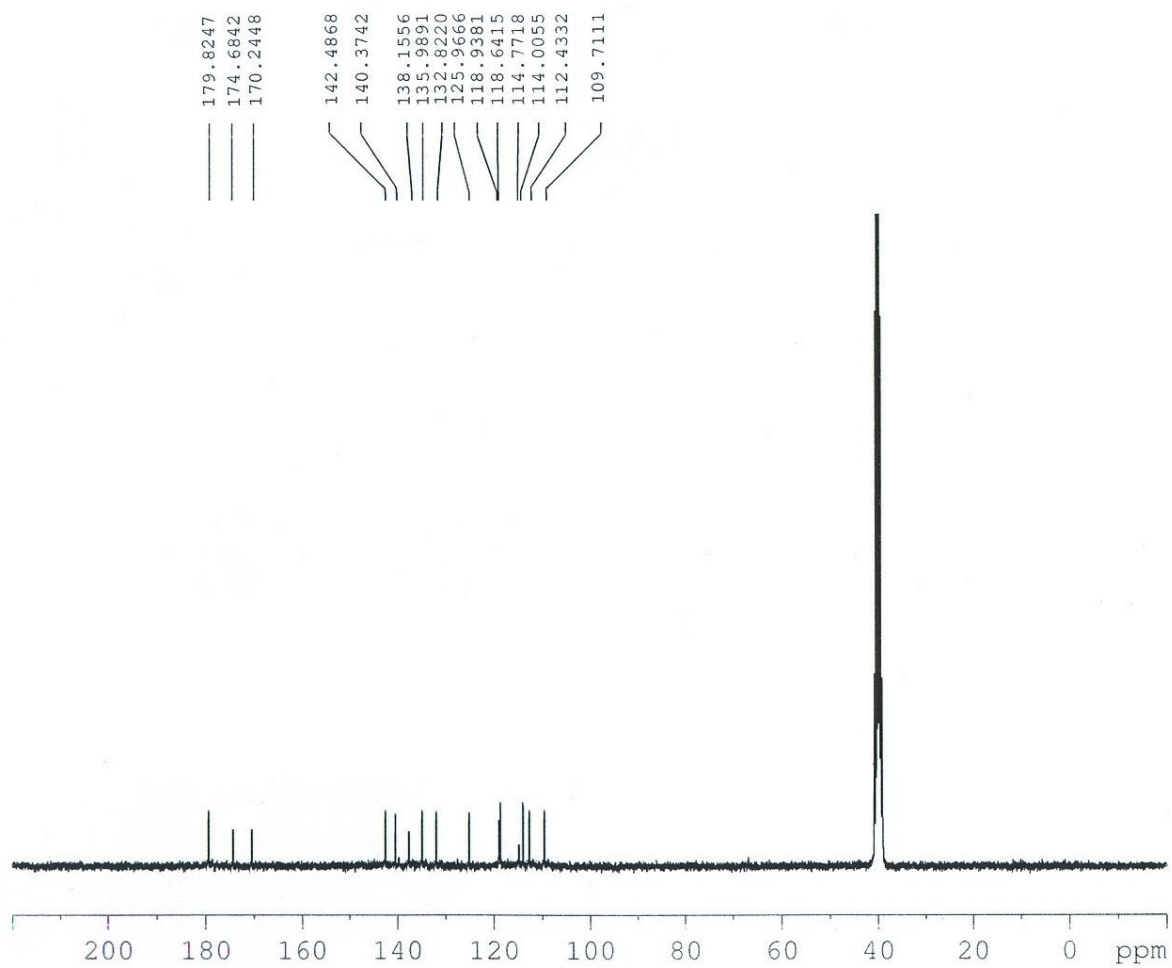

**Fig. S52.**  $^{13}\text{C}$  NMR spectrum of **S5** in  $\text{DMSO-d}_6$ .

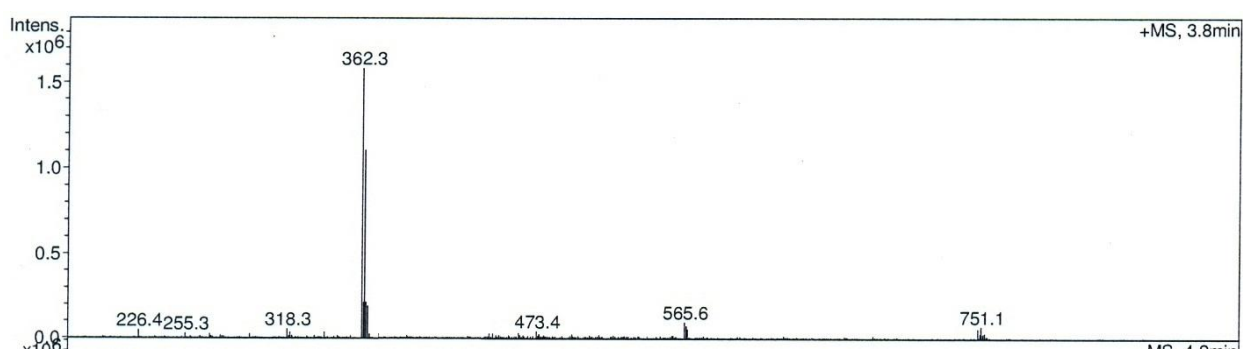

**Fig. S53.** LCMS spectrum of **S5**.

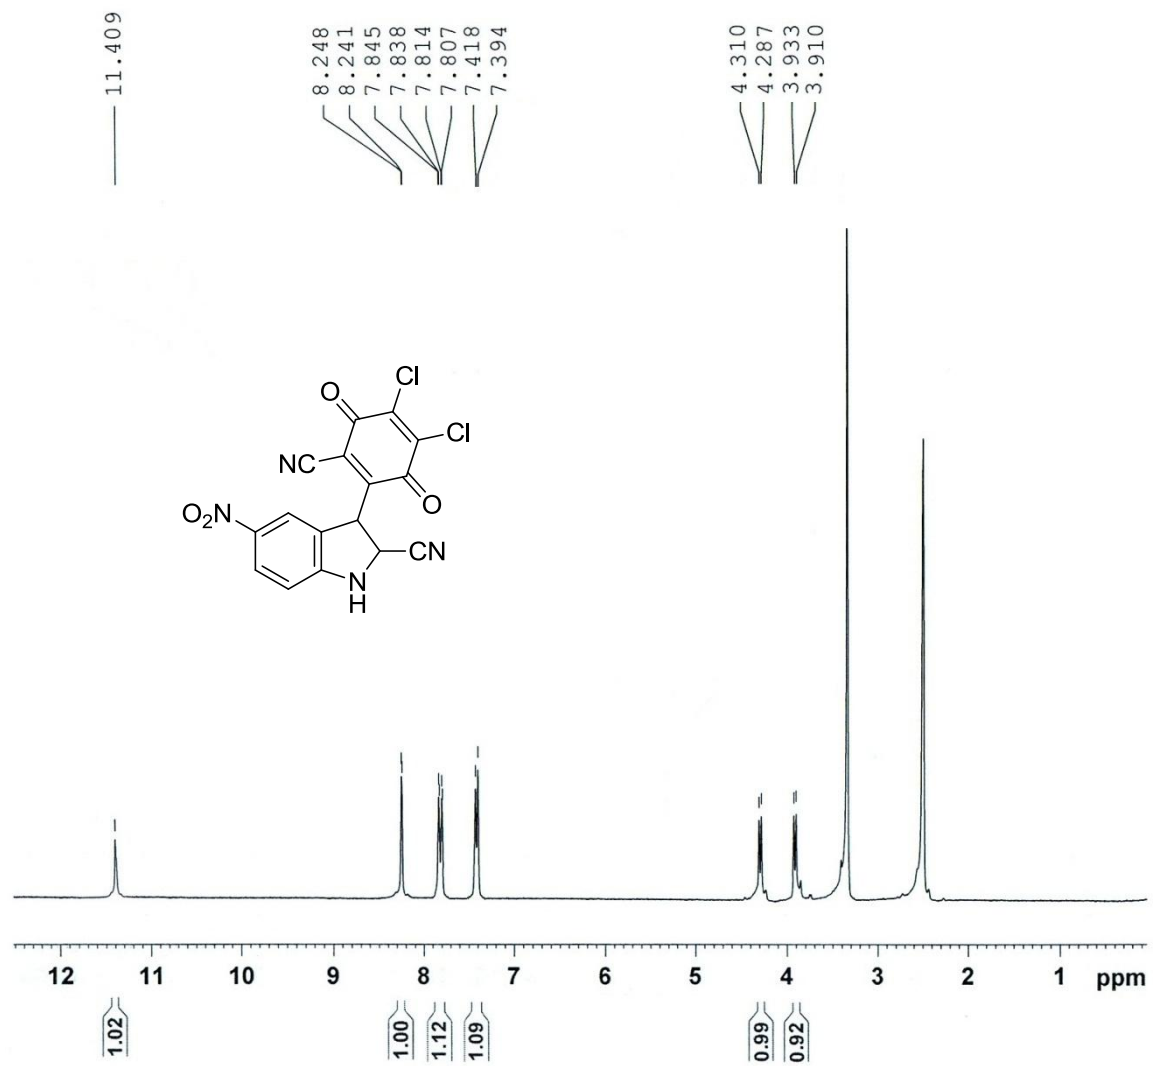

**Fig. S54.**  $^1\text{H}$  NMR spectrum of **S5** in  $\text{DMSO-d}_6$ .

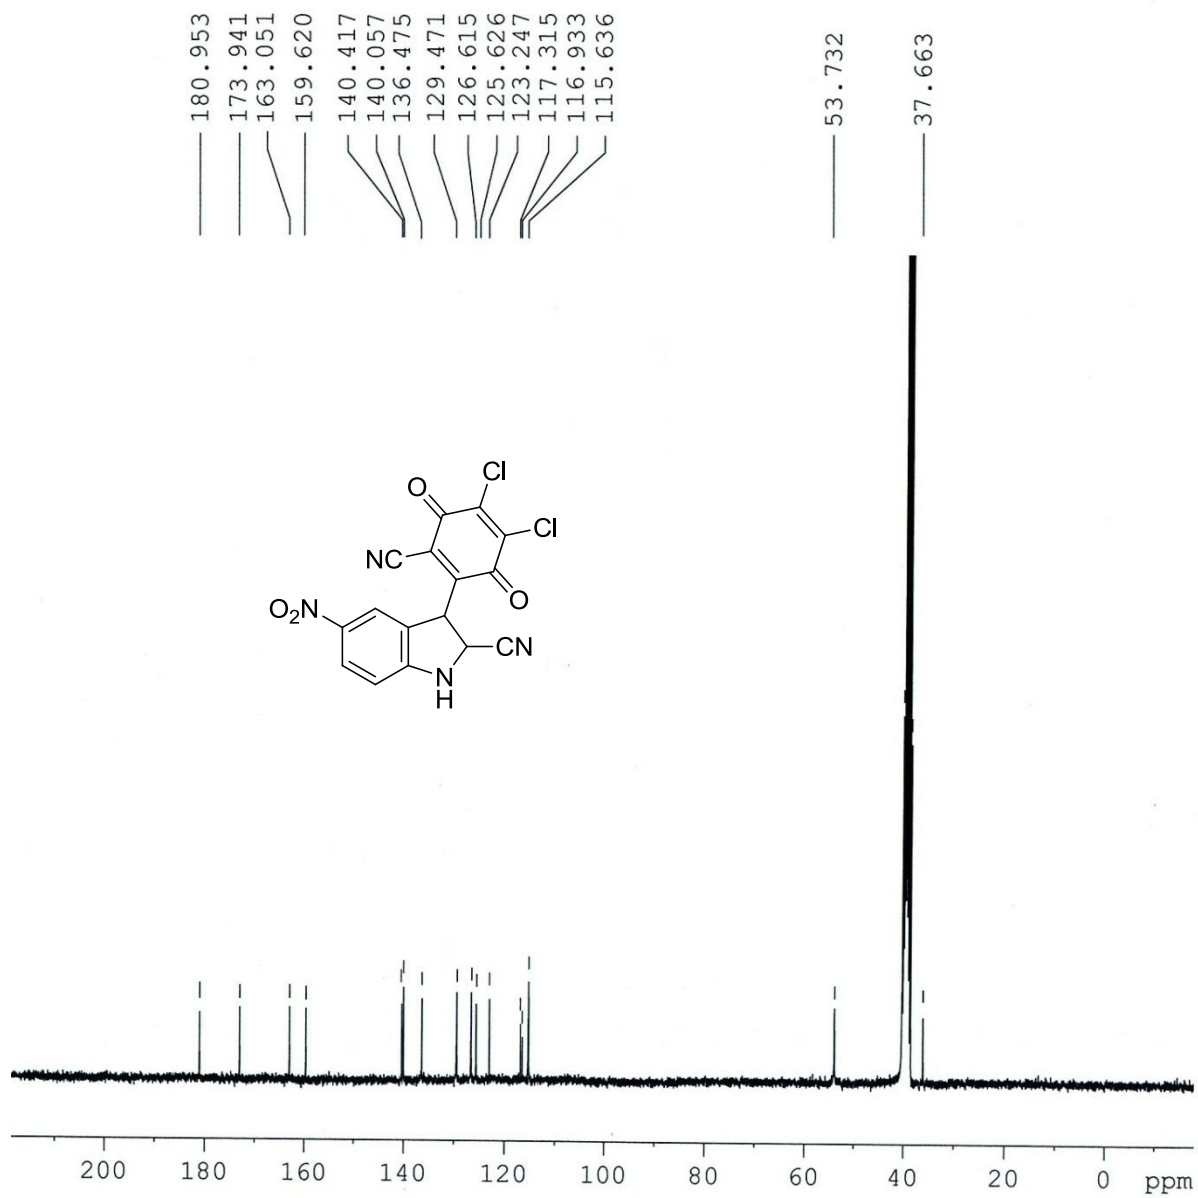

**Fig. S55.**  $^{13}\text{C}$  NMR spectrum of **S5** in  $\text{DMSO-d}_6$ .

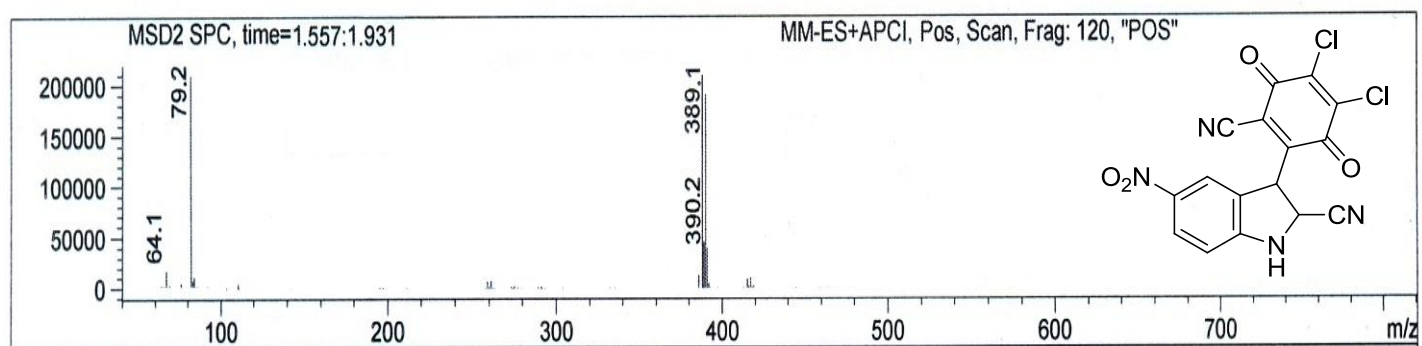

**Fig. S56.** LCMS spectrum of **S5**.
